# Supplementary material for: Effects of smart garments on the well-being of athletes: a scoping review protocol
Source: PubMed Central journal article supplement — BMJ Open. 2020 Nov 19;10(11):e042127. doi: 10.1136/bmjopen-2020-042127 (PMC7678371; doi:10.1136/bmjopen-2020-042127), 2020-11-19
Supplement: bmjopen-2020-042127.draft_revisions.pdf [file bmjopen-2020-042127.draft_revisions.pdf]

# BMJ Open

BMJ Open is committed to open peer review. As part of this commitment we make the peer review history of every article we publish publicly available.

When an article is published we post the peer reviewers' comments and the authors' responses online. We also post the versions of the paper that were used during peer review. These are the versions that the peer review comments apply to.

The versions of the paper that follow are the versions that were submitted during the peer review process. They are not the versions of record or the final published versions. They should not be cited or distributed as the published version of this manuscript.

BMJ Open is an open access journal and the full, final, typeset and author-corrected version of record of the manuscript is available on our site with no access controls, subscription charges or pay-per-view fees (<http://bmjopen.bmj.com>).

If you have any questions on BMJ Open's open peer review process please email [info.bmjopen@bmj.com](mailto:info.bmjopen@bmj.com)

# BMJ Open

## Effects of Smart Garments on the Wellbeing of Athletes: A Scoping Review Protocol

|                               |                                                                                                                                                                                                                                                                                                                       |
|-------------------------------|-----------------------------------------------------------------------------------------------------------------------------------------------------------------------------------------------------------------------------------------------------------------------------------------------------------------------|
| Journal:                      | <i>BMJ Open</i>                                                                                                                                                                                                                                                                                                       |
| Manuscript ID                 | bmjopen-2020-042127                                                                                                                                                                                                                                                                                                   |
| Article Type:                 | Protocol                                                                                                                                                                                                                                                                                                              |
| Date Submitted by the Author: | 26-Jun-2020                                                                                                                                                                                                                                                                                                           |
| Complete List of Authors:     | Al Mahmud, Abdullah ; Swinburne University of Technology, School of Design; Faculty of Health, Arts and Design<br>Wickramarathne, Tharushi; Swinburne University of Technology, Centre for Design Innovation<br>Kuys, Blair; Swinburne University of Technology, School of Design; Faculty of Health, Arts and Design |
| Keywords:                     | Health informatics < BIOTECHNOLOGY & BIOINFORMATICS, Information technology < BIOTECHNOLOGY & BIOINFORMATICS, Information management < BIOTECHNOLOGY & BIOINFORMATICS, World Wide Web technology < BIOTECHNOLOGY & BIOINFORMATICS                                                                                     |
|                               |                                                                                                                                                                                                                                                                                                                       |

SCHOLARONE™  
Manuscripts

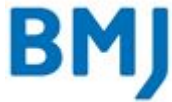

I, the Submitting Author has the right to grant and does grant on behalf of all authors of the Work (as defined in the below author licence), an exclusive licence and/or a non-exclusive licence for contributions from authors who are: i) UK Crown employees; ii) where BMJ has agreed a CC-BY licence shall apply, and/or iii) in accordance with the terms applicable for US Federal Government officers or employees acting as part of their official duties; on a worldwide, perpetual, irrevocable, royalty-free basis to BMJ Publishing Group Ltd ("BMJ") its licensees and where the relevant Journal is co-owned by BMJ to the co-owners of the Journal, to publish the Work in this journal and any other BMJ products and to exploit all rights, as set out in our [licence](#).

The Submitting Author accepts and understands that any supply made under these terms is made by BMJ to the Submitting Author unless you are acting as an employee on behalf of your employer or a postgraduate student of an affiliated institution which is paying any applicable article publishing charge ("APC") for Open Access articles. Where the Submitting Author wishes to make the Work available on an Open Access basis (and intends to pay the relevant APC), the terms of reuse of such Open Access shall be governed by a Creative Commons licence – details of these licences and which [Creative Commons](#) licence will apply to this Work are set out in our licence referred to above.

Other than as permitted in any relevant BMJ Author's Self Archiving Policies, I confirm this Work has not been accepted for publication elsewhere, is not being considered for publication elsewhere and does not duplicate material already published. I confirm all authors consent to publication of this Work and authorise the granting of this licence.

1  
2  
3 1 **Title: Effects of Smart Garments on the Wellbeing of Athletes: A Scoping**

4  
5 2 **Review Protocol**

6  
7 3

8  
9 4

10  
11 5 **Corresponding author:**

12  
13 6 Abdullah Al Mahmud, Centre for Design Innovations,

14  
15 7 *Swinburne University of Technology*

16  
17 8 Melbourne Australia

18  
19 9 +61 3 9214 3830

20  
21 10 aalmahmud@swin.edu.au

22  
23 11

24  
25 12 Tharushi Indeewari Wickramarathne,

26  
27 13 Centre for Design Innovations,

28  
29 14 *Swinburne University of Technology*

30  
31 15 Melbourne Australia

32  
33 16 102148423@student.swin.edu.au

34  
35 17

36  
37 18

38  
39 19 Blair Kuys,

40  
41 20 Centre for Design Innovations,

42  
43 21 *Swinburne University of Technology*

44  
45 22 Melbourne Australia

46  
47 23 bkuys@swin.edu.au

48  
49 24

50  
51 25

52  
53 26

1  
2  
3  
4 27  
5 28 **Title: Effects of Smart Garments on the Wellbeing of Athletes: A Scoping**

6  
7 29 **Review Protocol**

8  
9 30 **ABSTRACT**

10  
11 31 **Background:** With the advancements in wearable electronics, electronically  
12 32 integrated smart garments started to transpire in our daily lives. Smart garment  
13 33 technologies are incorporated into sportswear applications to enhance the wellbeing  
14 34 and performance of athletes. Smart garments applications in the sports sector are  
15 35 proliferating, and the variety of smart garment applications available in the literature  
16 36 is overwhelming. Therefore, it is essential to compare the wide variety of  
17 37 technologies incorporated in smart garments for athletes and also to understand the  
18 38 knowledge gaps for future studies. The protocol paper aims to examine the latest  
19 39 developments of smart garments used in the sports domain to enhance the health and  
20 40 wellbeing of athletes.

21 41 **Methods and analysis:** Relevant studies will be retrieved using pre-defined search  
22 42 terms, and the retrieved articles will be filtered, incorporating a two-stage screening  
23 43 process consisting of a title and abstract screening and full-text screening. The  
24 44 included articles will be primary studies published in the English language within the  
25 45 last ten years. Subsequently, the included articles will be further studied to extract  
26 46 data using a data extraction form. The extracted data will undergo a thematic analysis,  
27 47 followed by a narrative review. Also, quantitative analysis will be carried out using  
28 48 descriptive statistics.

29 49 **Discussion:** The protocol was developed adhering to the preferred guidelines for  
30 50 Systematic reviews and Meta-Analyses extension for Scoping Reviews (PRISMA-  
31 51 ScR). Results of this scoping review will provide a comprehensive understanding of  
32 52 smart garment concepts used in the sports domain, which enhance the wellness and

1  
2  
3 53 health of athletes. The study findings will be disseminated through scientific  
4  
5 54 publications.

6  
7  
8 55 **Ethics and Dissemination:** Ethical approval is not required for this study. The  
9  
10 56 findings of this review will be disseminated through a peer-reviewed publication and  
11  
12 57 a conference presentation.

13  
14  
15 58 **Protocol registration number:** DOI 10.17605/OSF.IO/34MF2 (<https://osf.io/34mf2>)

16 59  
17 60 **Keywords:** Smart garments, Athletes, Wellness, Sports, Health, Heat illnesses

18  
19 61 **Strengths and limitations of the study**

- 20  
21  
22 62 • The proposed study uses existing scoping review methodology to identify the  
23  
24 63 effects of smart garments on the wellbeing of athletes.
- 25  
26 64 • The study will provide an in-depth understanding of the current state of smart  
27  
28 65 sportswear for athletes.
- 29  
30 66 • The review will investigate a large volume of literature from the last ten years.
- 31  
32 67 • The scoping review will not consider the grey literature and studies published  
33  
34 68 in English will be reviewed.

35  
36  
37  
38 69 **BACKGROUND**

39  
40 70 Smart garments are clothing items that have been integrated with technology such as  
41  
42 71 sensors and may connect with an app or wearables such as Fitbit or smart watch.[1]  
43  
44 72 These wearable computers evolved from basic monitoring devices such as heart rate  
45  
46 73 monitor, fitness monitors and smart wristwatches to advance smart garments covering  
47  
48 74 a wide variety of markets. Smart garments enabled the integration of smart materials  
49  
50 75 into clothing for uplifting health, wellness and lifestyle of humans. Majority of smart  
51  
52 76 garment applications integrate sensors in garments, which can track/monitor  
53  
54 77 biological and environmental details. The ‘smart shirt’, which measure vital body  
55  
56 78 parameters and communicate with remote units is an example of a smart garment  
57  
58  
59  
60

1  
2  
3 79 application in the healthcare sector. [2, 3] This development was conducted primarily  
4  
5 80 to ensure occupational wellness focusing on occupations such as military, firefighters,  
6  
7 81 healthcare professionals, and police officers.[2, 3] Innovative wound care biosensing  
8  
9 82 is another smart clothing application.[4] These bio-monitoring sensors can monitor  
10  
11 83 critical wounds to enable the development of advance wound care treatments.  
12  
13 84 Temperature monitoring using wearable sensors for patients, aging population and for  
14  
15 85 children is also an interesting, smart application, which can be integrated into  
16  
17 86 garments.[5] Some studies elaborate on the smart cooling garment concepts, which  
18  
19 87 can provide intelligent cooling to the public to enhance cooling comfort and wellness.  
20  
21 88 [6, 7]  
22  
23  
24  
25  
26 89 Sports wellness is another vital domain addressed by smart garments. Sportswear  
27  
28 90 started getting subjected to unique demands of athletes, to protect the wearer from,  
29  
30 91 rigorous physical activities as well as from extreme environmental conditions. Hence,  
31  
32 92 to address complex sportswear requirements, smart garment concepts started to  
33  
34 93 outspread into the sportswear market. Existing studies elaborate on the use of sensors  
35  
36 94 in sportswear for applications such as body fluid measurement, physiological  
37  
38 95 parameters monitoring, posture controlling. [8, 9] Furthermore, smart textiles are used  
39  
40 96 in snowboarding activity where textile pressure sensors were used to recognise the  
41  
42 97 activities performed by users.[9] Another study developed a smart shirt and leggings  
43  
44 98 to measure heart and muscle activity, breathing rate and temperature. [10] With these  
45  
46 99 examples, it is evident that the smart garment technology can be incorporated into  
47  
48 100 sportswear applications to enhance the wellbeing and performance of sports  
49  
50 101 consumers. As mentioned in market reports, smart garment applications in the sports  
51  
52 102 sector are expected to exhibit high growth. [11]  
53  
54  
55  
56  
57  
58  
59  
60

### 103 **Rationale**

104 Several review papers have been published in the domain of wearable technology and  
105 smart garment technology. [12-15] However, most of these papers are focusing on  
106 medical or health care applications giving less priority to the wellness of athletes. [14,  
107 16, 17] Furthermore, the variety of smart garment applications available in the  
108 literature is overwhelming. Therefore, the current review is essential to compare the  
109 wide variety of technologies incorporated in smart garments for athletes and also to  
110 understand the knowledge gaps for future studies. [18, 19]

111 Some of the existing reviews discuss smart garment technologies that can be applied  
112 in the sportswear domain, yet they are either outdated [8, 9] or not comprehensive  
113 enough to provide an in-depth understanding of the current state of smart sportswear.  
114 [20] Due to the fast-evolving nature of smart garment applications, researchers  
115 frequently introduce novel technologies and materials. [21, 22] One such novel  
116 application in smart garment domain is the introduction of highly flexible, high-  
117 energy textile lithium battery, which can offer a stable, durable and safe energy  
118 supply for wearable electronics. [21] Gas detecting textiles, metatextiles, which can  
119 offer adaptable thermal comfort and energy harvesting Triboelectrics materials and  
120 are few other new smart garment applications. [21, 22]. These latest technologies can  
121 fulfil a wide variety of sportswear requirements shifting smart sports garments to a  
122 new dimension.

123 Considering requirements described above, a comprehensive review, which follows a  
124 systematic approach and covers the latest smart sports garment applications is  
125 essential to ensure effective use of latest technologies in future smart garment design  
126 projects and also to understand the gaps in the literature. Therefore, this study will  
127 provide a comprehensive review and a technology mapping of the latest smart sports  
128 garment technologies that can guide future research projects. The objectives of this



1  
2  
3 129 review are to identify a) the functions offered by the smart garments, b) the types of  
4  
5 130 technologies used in smart garments, c) effects (beneficial and harmful) of those  
6  
7 131 garments on the performance of athletes and their experience in using such garments.  
8  
9

## 10 132 **METHODS**

11  
12 133 We follow the scoping review methodology proposed by Arksey and O'Malley, and  
13  
14 134 we further refined it by the methodology developed by the Joanna Briggs  
15  
16 135 Institute.[23, 24] This protocol consists of six phases namely; 1. identifying the  
17  
18 136 research question, 2. identifying relevant literature, 3. study selection, 4. charting the  
19  
20 137 data, 5. collating, summarising and reporting the articles and 6. consulting and  
21  
22 138 translating knowledge (optional). Also, this protocol follows the guidelines for the  
23  
24 139 Preferred Reporting Items for Systematic reviews and Meta-Analyses extension for  
25  
26 140 Scoping Reviews (PRISMA-ScR) to optimise the quality of reporting (see additional  
27  
28 141 file 1).[25] The study has been registered in the Open Science Framework (OSF) on  
29  
30 142 June 25, 2020 (<https://osf.io/34mf2>).  
31  
32  
33  
34  
35  
36  
37

### 38 144 **Stage 1: identifying the research question**

39  
40  
41 145 The objective of this scoping review is to assess the existing studies to understand the  
42  
43 146 existing smart garment technologies, which are developed to enhance the health and  
44  
45 147 wellbeing of athletes. Also, this review will generate input requirements for the  
46  
47 148 research, which will carry out to develop a smart garment for endurance athletes. The  
48  
49 149 review is expected to address the below question and sub-questions.  
50  
51  
52  
53

- 54 150
- 55 • What functions do smart garments offer for athletes?
  - 56 151 • What are the tools and technologies incorporated into those smart
  - 57 152 garments?
- 58  
59  
60

- 1  
2  
3 153           • How effective are those smart garments to enhance the health and  
4  
5  
6 154           wellbeing of athletes and experience of athletes in using them?  
7  
8  
9 155

10 156   **Stage 2: identifying relevant studies**

11  
12 157   The search strategy was developed by the research team after reviewing related  
13  
14 158   literature, and an iterative approach was adhered to finalise the strategy (see  
15  
16 159   additional file 2). The search strings were generated by incorporating Boolean logic  
17  
18 160   and operators. These strings consist of search terms, which were finalised after getting  
19  
20 161   agreement from the research team. The search terms are "sensor garments",  
21  
22 162   "electronic garments", "smart garments", "smart apparel", sports, athletes.  
23  
24  
25

26 163   The databases, which were selected to collect literature are Scopus, Web of Science,  
27  
28 164   Science Direct, PubMed, and IEEE Xplore, and these databases were selected with  
29  
30 165   the help of an expert university librarian. Due to rapid technological changes, smart  
31  
32 166   garment applications are quickly becoming outdated; hence only the studies which  
33  
34 167   were published within the last ten years were considered for the review. Furthermore,  
35  
36 168   to ensure the credibility of the studies, we only considered peer-reviewed journal  
37  
38 169   articles. Also, only the studies in the English language will be included in the  
39  
40 170   analysis. The research team will review the first 50 search results from each database  
41  
42 171   before proceeding with the full search to ensure the accuracy of the search strategy.  
43  
44 172   However, during the execution of search strategy authors of primary studies or  
45  
46 173   reviews will be contacted for further information, if required. The latest search was  
47  
48 174   executed on 24/05/2020. The articles retrieved from the search will be imported into  
49  
50 175   the Covidence software, which will remove duplicated articles automatically from the  
51  
52 176   system.  
53  
54  
55  
56  
57  
58  
59  
60

1  
2  
3 **178 Stage 3: study selection: inclusion and exclusion criteria**  
4

5 179 We will carry out study selection incorporating two-step method. Initially, titles and  
6  
7 180 abstracts will be reviewed against the selection criteria and will be marked as  
8  
9 181 'include', 'exclude' or 'uncertain'. Two reviewers will conduct this screening  
10  
11 182 independently and a discussion will be conducted within the research team to resolve  
12  
13 183 any discrepancy and to fine-tune selection criteria. This screening and discussion  
14  
15 184 process will continue until we reach a consensus. [26] Subsequently, for the included  
16  
17 185 studies, the full-text review will be carried out against the selection criteria following  
18  
19 186 the same screening procedure. Grey literature will not be considered for this review.  
20  
21  
22

23  
24 187 This two-stage study selection process will be conducted incorporating a review  
25  
26 188 form (see additional file 3). Only the studies with electronic integrated smart sports  
27  
28 189 garment, which focus on health and wellbeing of athletes will be included for the  
29  
30 190 review. To simplify the screening process review form incorporates a few questions to  
31  
32 191 determine the inclusion decision;  
33  
34  
35  
36  
37  
38  
39

- 40 192 • Does the article is a peer-reviewed primary study?  
41  
42 193 • Does the article is published within the last ten years (2010-2019) in the  
43  
44 194 English language?  
45  
46 195 • Does the article involve smart garments  
47  
48 196 • Does the article focus on the health and wellbeing of athletes?  
49  
50  
51

52  
53 197 The citations of the included studies will be evaluated against selection criteria  
54  
55 198 following the same two-stage study selection process to select the additional studies  
56  
57 199 to be added.  
58  
59  
60

1  
2  
3 **200 Step 4: charting the data**  
4  
5

6  
7 201 All included studies will be reviewed and charted using a data extraction form (see  
8  
9 202 additional file 4). The details which will be extracted from the studies are study  
10  
11 203 citation, publication type, authors, study location, study year, target market, sample  
12  
13 204 characteristics (number of participants, demographics), garment type, number of  
14  
15 205 functions, function type (i.e., biomonitoring, coaching, warning, posture control),  
16  
17 206 technology characteristics (sensor type, method of power supply,  
18  
19 207 communication/feedback mechanism and interconnection), evaluation protocol  
20  
21 208 adhered, user acceptability of the concepts and outcome of the study (quantitative  
22  
23 209 results, qualitative themes, recommendations, key learnings, limitations).  
24  
25  
26  
27

28  
29 210 These details will be changed based on the studies included, and after a reviewer  
30  
31 211 carries out the charting, another reviewer will independently validate the charted  
32  
33 212 details.  
34  
35

36  
37 213

38  
39 **214 Stage 5: collating, summarising and reporting the results**  
40  
41

42  
43 215 The filtered studies will be analysed regarding the location which the study was  
44  
45 216 conducted, year of publication, market characteristics, garment type, technology  
46  
47 217 components incorporated such as sensors, power supply, conductive materials,  
48  
49 218 microprocessors and actuators, evaluation protocol adhered, user acceptability of the  
50  
51 219 concepts and the outcome of the study. These details will be presented using tables,  
52  
53 220 charts, and graphs and will be followed by a narrative review.  
54  
55

56  
57 221 Also, to understand the key themes related to the technology components, to consider  
58  
59 222 for the underlined research, a thematic analysis will be conducted for the review  
60

1  
2  
3 223 results. The scoping review discussion will be designed, considering themes that will  
4  
5 224 emerge. Furthermore, the research findings will be shared in relevant national and  
6  
7  
8 225 international conferences/peer-reviewed journals.  
9

10  
11 226

## 12 13 227 **DISCUSSION**

14  
15  
16  
17 228 The primary objective of this scoping review is to obtain an understanding of smart  
18  
19 229 garment applications in the sports domain, which were developed to enhance the  
20  
21 230 wellbeing of athletes. The search terms and strings for the study were developed, and  
22  
23  
24 231 suitable databases were selected, referring to the related literature. The inclusion  
25  
26 232 criteria for the review were determined based on the objectives of the study.  
27

28  
29  
30 233 Even though the defined scoping review protocol is endorsed with preferred scoping  
31  
32 234 review protocol guidelines, we want to admit some of the limitations in the study.  
33  
34 235 Including the studies, which are published only in the English language, restrict the  
35  
36 236 objectivity of the review. Also, the review will not include studies, which are review  
37  
38  
39 237 papers.  
40

41  
42 238 The proposed scoping review will provide a comprehensive understanding of the  
43  
44 239 existing smart garment applications in the sports domain. Additionally, the results of  
45  
46 240 this review will offer foundational know-how on sports smart garment applications  
47  
48  
49 241 that can inform new research.  
50

### 51 52 242 **Additional files**

53 243 Additional file 01: PRISMA-ScR Checklist. doc

54  
55 244 This document includes the PRISMA-ScR protocol checklist.

56  
57 245 Additional file 02: Search Strategy. doc  
58  
59  
60

1  
2  
3 246 This document includes the search strategy that will be incorporated to execute the  
4  
5 247 search.

6  
7  
8 248 Additional file 03: Review Form.xls

9  
10 249 This form includes the criteria for screening the sources for the scoping review.

11  
12 250 Additional file 04: Data extraction Form.xls

13  
14  
15 251 This form includes the format that will facilitate the charting of scoping review data  
16  
17 252 to enable analysis.

18  
19 253

20  
21 254 **Declarations**

22  
23  
24 255 **Acknowledgments**

25  
26 256 Not applicable

27  
28 257 **Funding**

29  
30 258 Not applicable

31  
32  
33 259 **Availability of data and materials**

34  
35 260 Not applicable

36  
37 261 **Author contribution**

38  
39  
40 262 AAM and TIW contributed to plan the study and prepare the manuscript. All the  
41 263 authors (AAM, TIW and BK) read and approved the final manuscript.

42  
43 264

44  
45 265 **Ethics approval and consent to participate**

46  
47 266 Not applicable.

48  
49 267 **Consent for publication**

50  
51 268 Not applicable

52  
53 269 **Competing interest**

54  
55  
56 270 The authors declare that they have no competing interests

57  
58 271 **Author details**

59  
60

1  
2  
3 272 Not applicable  
4  
5  
6 273  
7  
8 274  
9

10 275

## REFERENCES

- 11  
12 276 1. Ariyatun B, Holland R, Harrison D, et al. The future design direction of smart  
13 277 clothing development. *Journal of the Textile Institute* 2005;**96**(4):199-210.  
14 278 2. Georgia Tech Wearable Motherboard. Secondary.  
15 279 <http://www.gtwm.gatech.edu/>.  
16 280 3. Özyangan V, Abdulova V. Utilization of Smart Textiles in Healthcare.  
17 281 *International Journal of Electronics, Mechanical Mechatronics Engineering*  
18 282 **5**(4):1025-33.  
19 283 4. Smart textiles with biosensing capabilities. *Advances in Science and*  
20 284 *Technology*; 2013. Trans Tech Publ.  
21 285 5. Li H, Yang H, Li E, et al. Wearable sensors in intelligent clothing for measuring  
22 286 human body temperature based on optical fiber Bragg grating. *Optics*  
23 287 *express* 2012;**20**(11):11740-52.  
24 288 6. Battery powered heating and cooling suit. IEEE Long Island Systems,  
25 289 Applications and Technology (LISAT) Conference 2014; 2014 2-2 May  
26 290 2014.  
27 291 7. Wearable individual adapting cooling system using smartphone and heart beat  
28 292 sensor. 2016 55th Annual Conference of the Society of Instrument and  
29 293 Control Engineers of Japan (SICE); 2016 20-23 Sept. 2016.  
30 294 8. Textile-Based Wearable Sensors for Assisting Sports Performance. 2009 Sixth  
31 295 International Workshop on Wearable and Implantable Body Sensor  
32 296 Networks; 2009 3-5 June 2009.  
33 297 9. Textile pressure sensors for sports applications. SENSORS, 2010 IEEE; 2010.  
34 298 IEEE.  
35 299 10. Design of smart garments for sports and rehabilitation. IOP Conference  
36 300 Series: Materials Science and Engineering; 2018. IOP Publishing.  
37 301 11. Hanuska A, Chandramohan B, Bellamy L, et al. Smart clothing market  
38 302 analysis: Technical Report, 2016.  
39 303 12. Tang SLP, Stylios G. An overview of smart technologies for clothing design  
40 304 and engineering. *International Journal of Clothing Science Technology*  
41 305 2006.  
42 306 13. Papi E, Koh WS, McGregor AH. Wearable technology for spine movement  
43 307 assessment: A systematic review. *Journal of Biomechanics* 2017;**64**:186-  
44 308 97.  
45 309 14. Patel S, Park H, Bonato P, et al. A review of wearable sensors and systems  
46 310 with application in rehabilitation. *Journal of NeuroEngineering and*  
47 311 *Rehabilitation* 2012;**9**(1):21.  
48 312 15. Stoppa M, Chiolerio A. Wearable electronics and smart textiles: a critical  
49 313 review. *sensors* 2014;**14**(7):11957-92.  
50 314 16. Moral-Munoz JA, Zhang W, Cobo MJ, et al. Smartphone-based systems for  
51 315 physical rehabilitation applications: A systematic review. *Assistive*  
52 316 *Technology* 2019:1-14.

- 1  
2  
3 317 17. Kirk MA, Amiri M, Pirbaglou M, et al. Wearable Technology and Physical  
4 318 Activity Behavior Change in Adults With Chronic Cardiometabolic  
5 319 Disease: A Systematic Review and Meta-Analysis. *American Journal of*  
6 320 *Health Promotion* 2019;**33**(5):778-91.
- 8 321 18. Fernández-Caramés TM, Fraga-Lamas P. Towards the Internet of smart  
9 322 clothing: A review on IoT wearables and garments for creating intelligent  
10 323 connected e-textiles. *Electronics* 2018;**7**(12):405.
- 11 324 19. Sayem ASM, Teay SH, Shahariar H, et al. Review on Smart Electro-Clothing  
12 325 Systems (SeCSs). 2019.
- 14 326 20. Rajput M, Singh R. Study of smart textile in sports and designing a smart  
15 327 jersey for athletes health issue. *International Research Journal of*  
16 328 *Engineering and Technology* 2017;**04**(06).
- 17 329 21. The Hong Kong Polytechnic University. Highly flexible high-energy textile  
18 330 lithium battery to cope with surging demand for wearable electronics.  
19 331 Secondary Highly flexible high-energy textile lithium battery to cope with  
20 332 surging demand for wearable electronics 2019.  
21 333 <https://www.sciencedaily.com/releases/2019/05/190524102744.htm>.
- 23 334 22. Kapfunde M. 5 innovations that could help smart clothing go mainstream.  
24 335 Secondary 5 innovations that could help smart clothing go mainstream  
25 336 2019. [https://www.wearable.com/smart-clothing/smart-clothing-](https://www.wearable.com/smart-clothing/smart-clothing-technology-innovations-7284)  
26 337 [technology-innovations-7284](https://www.wearable.com/smart-clothing/smart-clothing-technology-innovations-7284).
- 28 338 23. Arksey H, O'Malley L. Scoping studies: towards a methodological framework.  
29 339 *International journal of social research methodology* 2005;**8**(1):19-32.
- 30 340 24. Joanna Briggs Institute. The Joanna Briggs Institute reviewers' manual 2015:  
31 341 Methodology for JBI scoping reviews. *Joanne Briggs Inst* 2015:1-24.
- 32 342 25. Tricco AC, Lillie E, Zarin W, et al. PRISMA extension for scoping reviews  
33 343 (PRISMA-ScR): checklist and explanation. *Ann Intern Med* 2018;**169**:467-  
34 344 73.
- 36 345 26. Orwin R, Decisions E, Cooper I, et al. *The Handbook of Research Synthesis*  
37 346 1994:150-1.
- 38 347



## Preferred Reporting Items for Systematic reviews and Meta-Analyses extension for Scoping Reviews (PRISMA-ScR) Checklist

| SECTION                                               | ITEM | PRISMA-ScR CHECKLIST ITEM                                                                                                                                                                                                                                                                                  | REPORTED ON PAGE #        |
|-------------------------------------------------------|------|------------------------------------------------------------------------------------------------------------------------------------------------------------------------------------------------------------------------------------------------------------------------------------------------------------|---------------------------|
| <b>TITLE</b>                                          |      |                                                                                                                                                                                                                                                                                                            |                           |
| Title                                                 | 1    | Identify the report as a scoping review.                                                                                                                                                                                                                                                                   | 1                         |
| <b>ABSTRACT</b>                                       |      |                                                                                                                                                                                                                                                                                                            |                           |
| Structured summary                                    | 2    | Provide a structured summary that includes (as applicable): background, objectives, eligibility criteria, sources of evidence, charting methods, results, and conclusions that relate to the review questions and objectives.                                                                              | 2                         |
| <b>INTRODUCTION</b>                                   |      |                                                                                                                                                                                                                                                                                                            |                           |
| Rationale                                             | 3    | Describe the rationale for the review in the context of what is already known. Explain why the review questions/objectives lend themselves to a scoping review approach.                                                                                                                                   | 5-6                       |
| Objectives                                            | 4    | Provide an explicit statement of the questions and objectives being addressed with reference to their key elements (e.g., population or participants, concepts, and context) or other relevant key elements used to conceptualize the review questions and/or objectives.                                  | 5-6                       |
| <b>METHODS</b>                                        |      |                                                                                                                                                                                                                                                                                                            |                           |
| Protocol and registration                             | 5    | Indicate whether a review protocol exists; state if and where it can be accessed (e.g., a Web address); and if available, provide registration information, including the registration number.                                                                                                             | Click here to enter text. |
| Eligibility criteria                                  | 6    | Specify characteristics of the sources of evidence used as eligibility criteria (e.g., years considered, language, and publication status), and provide a rationale.                                                                                                                                       | 7-9                       |
| Information sources*                                  | 7    | Describe all information sources in the search (e.g., databases with dates of coverage and contact with authors to identify additional sources), as well as the date the most recent search was executed.                                                                                                  | 7-8                       |
| Search                                                | 8    | Present the full electronic search strategy for at least 1 database, including any limits used, such that it could be repeated.                                                                                                                                                                            | Appendix                  |
| Selection of sources of evidence†                     | 9    | State the process for selecting sources of evidence (i.e., screening and eligibility) included in the scoping review.                                                                                                                                                                                      | 8-9                       |
| Data charting process‡                                | 10   | Describe the methods of charting data from the included sources of evidence (e.g., calibrated forms or forms that have been tested by the team before their use, and whether data charting was done independently or in duplicate) and any processes for obtaining and confirming data from investigators. | 9-10                      |
| Data items                                            | 11   | List and define all variables for which data were sought and any assumptions and simplifications made.                                                                                                                                                                                                     | 9-10                      |
| Critical appraisal of individual sources of evidence§ | 12   | If done, provide a rationale for conducting a critical appraisal of included sources of evidence; describe the methods used and how this information was used in any data synthesis (if appropriate).                                                                                                      | NA                        |
| Synthesis of results                                  | 13   | Describe the methods of handling and summarizing the data that were charted.                                                                                                                                                                                                                               | 10                        |

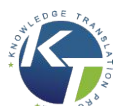

| SECTION                                       | ITEM | PRISMA-ScR CHECKLIST ITEM                                                                                                                                                                       | REPORTED ON PAGE # |
|-----------------------------------------------|------|-------------------------------------------------------------------------------------------------------------------------------------------------------------------------------------------------|--------------------|
| <b>RESULTS</b>                                |      |                                                                                                                                                                                                 |                    |
| Selection of sources of evidence              | 14   | Give numbers of sources of evidence screened, assessed for eligibility, and included in the review, with reasons for exclusions at each stage, ideally using a flow diagram.                    | NA                 |
| Characteristics of sources of evidence        | 15   | For each source of evidence, present characteristics for which data were charted and provide the citations.                                                                                     | NA                 |
| Critical appraisal within sources of evidence | 16   | If done, present data on critical appraisal of included sources of evidence (see item 12).                                                                                                      | NA                 |
| Results of individual sources of evidence     | 17   | For each included source of evidence, present the relevant data that were charted that relate to the review questions and objectives.                                                           | NA                 |
| Synthesis of results                          | 18   | Summarize and/or present the charting results as they relate to the review questions and objectives.                                                                                            | NA                 |
| <b>DISCUSSION</b>                             |      |                                                                                                                                                                                                 |                    |
| Summary of evidence                           | 19   | Summarize the main results (including an overview of concepts, themes, and types of evidence available), link to the review questions and objectives, and consider the relevance to key groups. | NA                 |
| Limitations                                   | 20   | Discuss the limitations of the scoping review process.                                                                                                                                          | 3                  |
| Conclusions                                   | 21   | Provide a general interpretation of the results with respect to the review questions and objectives, as well as potential implications and/or next steps.                                       | NA                 |
| <b>FUNDING</b>                                |      |                                                                                                                                                                                                 |                    |
| Funding                                       | 22   | Describe sources of funding for the included sources of evidence, as well as sources of funding for the scoping review. Describe the role of the funders of the scoping review.                 | 11                 |

JBI = Joanna Briggs Institute; PRISMA-ScR = Preferred Reporting Items for Systematic reviews and Meta-Analyses extension for Scoping Reviews.

\* Where *sources of evidence* (see second footnote) are compiled from, such as bibliographic databases, social media platforms, and Web sites.

† A more inclusive/heterogeneous term used to account for the different types of evidence or data sources (e.g., quantitative and/or qualitative research, expert opinion, and policy documents) that may be eligible in a scoping review as opposed to only studies. This is not to be confused with *information sources* (see first footnote).

‡ The frameworks by Arksey and O'Malley (6) and Levac and colleagues (7) and the JBI guidance (4, 5) refer to the process of data extraction in a scoping review as data charting.

§ The process of systematically examining research evidence to assess its validity, results, and relevance before using it to inform a decision. This term is used for items 12 and 19 instead of "risk of bias" (which is more applicable to systematic reviews of interventions) to include and acknowledge the various sources of evidence that may be used in a scoping review (e.g., quantitative and/or qualitative research, expert opinion, and policy document).

From: Tricco AC, Lillie E, Zarin W, O'Brien KK, Colquhoun H, Levac D, et al. PRISMA Extension for Scoping Reviews (PRISMA-ScR): Checklist and Explanation. *Ann Intern Med.* 2018;169:467–473. doi: 10.7326/M18-0850.

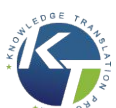

## Smart Garments to Enhance Health and Wellbeing of Athletes

| database | Search string                                                                                                                                                                                                                                                                                                                                                                                                                                                                                                                                                                   | Number of entries | date       | Source type/s | Data                                                                | Time frame |
|----------|---------------------------------------------------------------------------------------------------------------------------------------------------------------------------------------------------------------------------------------------------------------------------------------------------------------------------------------------------------------------------------------------------------------------------------------------------------------------------------------------------------------------------------------------------------------------------------|-------------------|------------|---------------|---------------------------------------------------------------------|------------|
| Scopus   | ALL ( ( "sensor garment*" OR "electronic garment*" OR "smart garment*" OR "smart apparel" ) AND ( sport* OR athlet* ) AND ( health OR well-being OR wellness OR illnesses ) ) AND ( LIMIT-TO ( PUBYEAR , 2018 ) OR LIMIT-TO ( PUBYEAR , 2017 ) OR LIMIT-TO ( PUBYEAR , 2016 ) OR LIMIT-TO ( PUBYEAR , 2015 ) OR LIMIT-TO ( PUBYEAR , 2019 ) OR LIMIT-TO ( PUBYEAR , 2014 ) OR LIMIT-TO ( PUBYEAR , 2013 ) OR LIMIT-TO ( PUBYEAR , 2012 ) OR LIMIT-TO ( PUBYEAR , 2011 ) OR LIMIT-TO ( PUBYEAR , 2010 ) ) AND ( LIMIT-TO ( SRCTYPE , "j" ) ) AND ( LIMIT-TO ( DOCTYPE , "ar" ) ) | 50                | 05/06/2020 | Journals      | ALL*                                                                | 2010-2019  |
| IEEE     | (("Full Text & Metadata":sensor garment OR sensor garments OR electronic garment OR electronic garments OR smart garment OR smart garments OR smart apparel) AND "Full Text & Metadata":sport% OR athlet%)<br><br><b>Filters Applied:</b><br>2010 - 2019                                                                                                                                                                                                                                                                                                                        | 84                | 05/06/2020 | Journals      | Full text + Meta data ( <i>Abstract, title and indexing terms</i> ) | 2010-2019  |

|    |                |                                                                                                                                                                                                   |     |            |                                                                    |                                                              |
|----|----------------|---------------------------------------------------------------------------------------------------------------------------------------------------------------------------------------------------|-----|------------|--------------------------------------------------------------------|--------------------------------------------------------------|
| 1  |                |                                                                                                                                                                                                   |     |            |                                                                    |                                                              |
| 2  |                |                                                                                                                                                                                                   |     |            |                                                                    |                                                              |
| 3  |                |                                                                                                                                                                                                   |     |            |                                                                    |                                                              |
| 4  | Web of Science | TS=(( "sensor garment*" OR "electronic garment*" OR "smart garment*" OR "smart apparel") AND (sport* OR athlet*))<br><b>Refined by:</b> DOCUMENT TYPES: ( ARTICLE )<br><b>Timespan:</b> 2019-2010 | 1   | 05/06/2020 | Article                                                            | TS=Topic Searches title, abstract, author keywords, and more |
| 5  |                |                                                                                                                                                                                                   |     |            |                                                                    |                                                              |
| 6  |                |                                                                                                                                                                                                   |     |            |                                                                    |                                                              |
| 7  |                |                                                                                                                                                                                                   |     |            |                                                                    |                                                              |
| 8  |                |                                                                                                                                                                                                   |     |            |                                                                    |                                                              |
| 9  |                |                                                                                                                                                                                                   |     |            |                                                                    |                                                              |
| 10 |                |                                                                                                                                                                                                   |     |            |                                                                    |                                                              |
| 11 |                |                                                                                                                                                                                                   |     |            |                                                                    |                                                              |
| 12 |                |                                                                                                                                                                                                   |     |            |                                                                    |                                                              |
| 13 | Science Direct | (sensor OR smart OR electronic) AND (garment OR garments) AND (sport OR sports OR athlete OR athletes)<br><b>Timespan:</b> 2019-2010                                                              | 415 | 05/06/2020 | Research articles                                                  | Full text                                                    |
| 14 |                |                                                                                                                                                                                                   |     |            |                                                                    |                                                              |
| 15 |                |                                                                                                                                                                                                   |     |            |                                                                    |                                                              |
| 16 |                |                                                                                                                                                                                                   |     |            |                                                                    |                                                              |
| 17 |                |                                                                                                                                                                                                   |     |            |                                                                    |                                                              |
| 18 |                |                                                                                                                                                                                                   |     |            |                                                                    |                                                              |
| 19 |                |                                                                                                                                                                                                   |     |            |                                                                    |                                                              |
| 20 |                |                                                                                                                                                                                                   |     |            |                                                                    |                                                              |
| 21 |                |                                                                                                                                                                                                   |     |            |                                                                    |                                                              |
| 22 |                |                                                                                                                                                                                                   |     |            |                                                                    |                                                              |
| 23 | PubMed         | ( "sensor garment*" OR "electronic garment*" OR "smart garment*" OR "smart apparel" ) AND ( sport* OR athlet* )<br><br>Year-2010-2019                                                             | 5   | 25/06/2020 | Books and Documents<br>Clinical trials<br>Randomised control trial | Full text                                                    |
| 24 |                |                                                                                                                                                                                                   |     |            |                                                                    |                                                              |
| 25 |                |                                                                                                                                                                                                   |     |            |                                                                    |                                                              |
| 26 |                |                                                                                                                                                                                                   |     |            |                                                                    |                                                              |
| 27 |                |                                                                                                                                                                                                   |     |            |                                                                    |                                                              |
| 28 |                |                                                                                                                                                                                                   |     |            |                                                                    |                                                              |
| 29 |                |                                                                                                                                                                                                   |     |            |                                                                    |                                                              |
| 30 |                |                                                                                                                                                                                                   |     |            |                                                                    |                                                              |
| 31 |                |                                                                                                                                                                                                   |     |            |                                                                    |                                                              |
| 32 |                |                                                                                                                                                                                                   |     |            |                                                                    |                                                              |
| 33 |                |                                                                                                                                                                                                   |     |            |                                                                    |                                                              |
| 34 |                |                                                                                                                                                                                                   |     |            |                                                                    |                                                              |
| 35 |                |                                                                                                                                                                                                   |     |            |                                                                    |                                                              |
| 36 |                |                                                                                                                                                                                                   |     |            |                                                                    |                                                              |
| 37 |                |                                                                                                                                                                                                   |     |            |                                                                    |                                                              |
| 38 |                |                                                                                                                                                                                                   |     |            |                                                                    |                                                              |
| 39 |                |                                                                                                                                                                                                   |     |            |                                                                    |                                                              |
| 40 |                |                                                                                                                                                                                                   |     |            |                                                                    |                                                              |
| 41 |                |                                                                                                                                                                                                   |     |            |                                                                    |                                                              |
| 42 |                |                                                                                                                                                                                                   |     |            |                                                                    |                                                              |
| 43 |                |                                                                                                                                                                                                   |     |            |                                                                    |                                                              |
| 44 |                |                                                                                                                                                                                                   |     |            |                                                                    |                                                              |
| 45 |                |                                                                                                                                                                                                   |     |            |                                                                    |                                                              |
| 46 |                |                                                                                                                                                                                                   |     |            |                                                                    |                                                              |

*\*SCOPUS ALL: Entering ALL("heart attack") will return documents with "heart attack" in the article title, source title, language, author, editor, affiliation, abstract, keywords, references, DOI, ISBN, ISSN, CODEN, issue, volume, publication year, sequence bank, sequence bank number, article number, chemical name, CAS registry number, manufacturer, publisher, or conference fields*

Language Filter was not used for the pilot search strategy

## SCOPUS

Advance search query:

```
ALL ( ( "sensor garment*" OR "electronic garment*" OR "smart garment*" OR "smart apparel" ) AND (
sport* OR athlet* ) AND ( health OR well-being OR wellness OR illnesses ) )
) AND ( LIMIT-TO ( SRCTYPE , "j" ) ) AND ( LIMIT-TO ( DOCTYPE , "ar" ) ) AND
LIMIT-TO ( PUBYEAR,2018)
OR LIMIT-TO ( PUBYEAR,2017)
OR LIMIT-TO ( PUBYEAR,2016)
OR LIMIT-TO ( PUBYEAR,2015)
OR LIMIT-TO ( PUBYEAR,2019)

OR LIMIT-TO ( PUBYEAR,2014)
OR LIMIT-TO ( PUBYEAR,2013)
OR LIMIT-TO ( PUBYEAR,2012)
OR LIMIT-TO ( PUBYEAR,2011)
OR LIMIT-TO ( PUBYEAR,2010)
)
```

1  
2  
3  
4  
5  
6  
7  
8  
9  
10  
11  
12  
13  
14  
15  
16  
17  
18  
19  
20  
21  
22  
23  
24  
25  
26  
27  
28  
29  
30  
31  
32  
33  
34  
35  
36  
37  
38  
39  
40  
41  
42  
43  
44  
45  
46

# IEEE

For peer review only

## Step 01

---

### Advanced Search ?

Advanced Search | Command Search | Citation Search

Enter keywords, select fields, and select operators

Search Term  in  ?

AND  in  ↑ × +

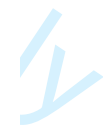

## Step 02

Filtering year range & filtering the source types: Journals and conferences

Year ^

Single Year **Range**

2010 2019

From To

2010 2019

For peer review only

Showing 1-25 of 117 for  
 ("Full Text & Metadata":sensor garment OR sensor garments OR electronic garment OR electronic garments OR smart garment OR smart garments OR smart apparel) AND "Full Text & Metadata":sport% OR athlet%  
 health OR well-being OR wellness OR illnesses

Filters Applied: 2010 - 2019

- Conferences (74)
- Journals (25)
- Magazines (8)
- Books (6)
- Standards (3)
- Early Access Articles (1)

Apply

Feedback

## Web of Science

Advance search query:

TS=(( "sensor garment\*" OR "electronic garment\*" OR "smart garment\*" OR "smart apparel") AND (sport\* OR athlet\*))

**Refined by:** DOCUMENT TYPES: ( ARTICLE )

**Timespan:** 2019-2010

## Science Direct

Advance search query:



1  
2  
3 (sensor OR smart OR electronic) AND (garment OR garments) AND (sport OR sports OR athlete OR  
4 athletes)  
5  
6  
7

8  
9 **Year:** 2010-2019  
10

11  
12  
13  
14 **Article Types:** Research articles  
15  
16  
17

18  
19  
20  
21 PubMed  
22  
23  
24

25  
26  
27 **Advance search query:**  
28

29 ( "sensor garment\*" OR "electronic garment\*" OR "smart garment\*" OR "smart apparel" ) AND ( sport\*  
30 OR athlet\* )  
31  
32  
33

34  
35  
36 **Year:** 2010-2019  
37  
38  
39  
40  
41  
42

1  
2  
3  
4  
5  
6  
7  
8  
9  
10  
11  
12  
13  
14  
15  
16  
17  
18  
19  
20  
21  
22  
23  
24  
25  
26  
27  
28  
29  
30  
31  
32  
33  
34  
35  
36  
37  
38  
39  
40  
41  
42  
43  
44  
45  
46

**Article Types:**

- Books and Documents
- Clinical trials
- Randomised control trial

For peer review only

1  
2  
3  
4  
5  
6  
7  
8  
9  
10  
11  
12  
13  
14  
15  
16  
17  
18  
19  
20  
21  
22  
23  
24  
25  
26  
27  
28  
29  
30  
31  
32  
33  
34  
35  
36  
37  
38  
39  
40  
41  
42  
43  
44  
45  
46  
47  
48  
49  
50  
51  
52  
53  
54  
55  
56  
57  
58  
59  
60

| Paper ID | Title | Inclusion/exclusion criteria |
|----------|-------|------------------------------|
|----------|-------|------------------------------|

For peer review only

1  
2  
3  
4  
5  
6  
7  
8  
9  
10  
11  
12  
13  
14  
15  
16  
17  
18  
19  
20  
21  
22  
23  
24  
25  
26  
27  
28  
29  
30  
31  
32  
33  
34  
35  
36  
37  
38  
39  
40  
41  
42  
43  
44  
45  
46  
47  
48  
49  
50  
51  
52  
53  
54  
55  
56  
57  
58  
59  
60

Decision

For peer review only



# BMJ Open

## Effects of Smart Garments on the Wellbeing of Athletes: A Scoping Review Protocol

|                                 |                                                                                                                                                                                                                                                                                                                       |
|---------------------------------|-----------------------------------------------------------------------------------------------------------------------------------------------------------------------------------------------------------------------------------------------------------------------------------------------------------------------|
| Journal:                        | <i>BMJ Open</i>                                                                                                                                                                                                                                                                                                       |
| Manuscript ID                   | bmjopen-2020-042127.R1                                                                                                                                                                                                                                                                                                |
| Article Type:                   | Protocol                                                                                                                                                                                                                                                                                                              |
| Date Submitted by the Author:   | 26-Sep-2020                                                                                                                                                                                                                                                                                                           |
| Complete List of Authors:       | Al Mahmud, Abdullah ; Swinburne University of Technology, School of Design; Faculty of Health, Arts and Design<br>Wickramarathne, Tharushi; Swinburne University of Technology, Centre for Design Innovation<br>Kuys, Blair; Swinburne University of Technology, School of Design; Faculty of Health, Arts and Design |
| <b>Primary Subject Heading</b>: | Health informatics                                                                                                                                                                                                                                                                                                    |
| Secondary Subject Heading:      | Health informatics, Public health, Health services research, Health policy, Sports and exercise medicine                                                                                                                                                                                                              |
| Keywords:                       | Health informatics < BIOTECHNOLOGY & BIOINFORMATICS, Information technology < BIOTECHNOLOGY & BIOINFORMATICS, Information management < BIOTECHNOLOGY & BIOINFORMATICS, World Wide Web technology < BIOTECHNOLOGY & BIOINFORMATICS                                                                                     |
|                                 |                                                                                                                                                                                                                                                                                                                       |

SCHOLARONE™  
Manuscripts



I, the Submitting Author has the right to grant and does grant on behalf of all authors of the Work (as defined in the below author licence), an exclusive licence and/or a non-exclusive licence for contributions from authors who are: i) UK Crown employees; ii) where BMJ has agreed a CC-BY licence shall apply, and/or iii) in accordance with the terms applicable for US Federal Government officers or employees acting as part of their official duties; on a worldwide, perpetual, irrevocable, royalty-free basis to BMJ Publishing Group Ltd ("BMJ") its licensees and where the relevant Journal is co-owned by BMJ to the co-owners of the Journal, to publish the Work in this journal and any other BMJ products and to exploit all rights, as set out in our [licence](#).

The Submitting Author accepts and understands that any supply made under these terms is made by BMJ to the Submitting Author unless you are acting as an employee on behalf of your employer or a postgraduate student of an affiliated institution which is paying any applicable article publishing charge ("APC") for Open Access articles. Where the Submitting Author wishes to make the Work available on an Open Access basis (and intends to pay the relevant APC), the terms of reuse of such Open Access shall be governed by a Creative Commons licence – details of these licences and which [Creative Commons](#) licence will apply to this Work are set out in our licence referred to above.

Other than as permitted in any relevant BMJ Author's Self Archiving Policies, I confirm this Work has not been accepted for publication elsewhere, is not being considered for publication elsewhere and does not duplicate material already published. I confirm all authors consent to publication of this Work and authorise the granting of this licence.

1  
2  
3 1 **Title: Effects of Smart Garments on the Wellbeing of Athletes: A Scoping Review**  
4

5 2 **Protocol**  
6  
7

8 3  
9

10 4  
11

12 5 **Corresponding author:**  
13

14 6 Abdullah Al Mahmud, Centre for Design Innovation,  
15

16 7 *Swinburne University of Technology*  
17

18 8 Melbourne Australia  
19

20 9 +61 3 9214 3830  
21

22 10 aalmahmud@swin.edu.au  
23

24 11  
25

26 12 Tharushi Indeewari Wickramarathne,  
27

28 13 Centre for Design Innovation,  
29

30 14 *Swinburne University of Technology*  
31

32 15 Melbourne Australia  
33

34 16 twickramarathne@swin.edu.au  
35

36 17  
37

38 18  
39

40 19 Blair Kuys,  
41

42 20 Centre for Design Innovation,  
43

44 21 *Swinburne University of Technology*  
45

46 22 Melbourne Australia  
47

48 23 bkuys@swin.edu.au  
49

50 24  
51

52 25  
53

54 26  
55  
56  
57  
58  
59  
60



1  
2  
3 27 **Title: Effects of Smart Garments on the Wellbeing of Athletes: A Scoping Review**  
4

5 28 **Protocol**  
6

7 29 **ABSTRACT**  
8

9  
10 30 **Introduction** With the advancements in wearable electronics, electronically integrated  
11  
12 31 smart garments started to transpire in our daily lives. Smart garment technologies are  
13  
14 32 incorporated into sportswear applications to enhance the wellbeing and performance of  
15  
16 33 athletes. Smart garments applications in the sports sector are increasing, and the variety  
17  
18 34 of smart garment applications available in the literature is overwhelming. Therefore, it  
19  
20 35 is essential to compare the vast array of technologies incorporated in smart garments  
21  
22 36 for athletes to understand the knowledge gaps for future studies. The protocol paper  
23  
24 37 aims to examine the smart garments used in the sports domain to enhance the health  
25  
26 38 and wellbeing of athletes.  
27  
28  
29

30 39 **Methods and analysis** Relevant studies will be retrieved using pre-defined search  
31  
32 40 terms from Scopus, Web of Science, Science Direct, PubMed, and IEEE Xplore. The  
33  
34 41 retrieved articles will be eliminated in two phases: title and abstract screening and full-  
35  
36 42 text screening. The included articles will be primary studies published in the English  
37  
38 43 language within the last ten years. Subsequently, the included articles will be further  
39  
40 44 studied to extract data using a data extraction form. The extracted data will undergo a  
41  
42 45 thematic analysis. Also, quantitative analysis will be carried out using descriptive  
43  
44 46 statistics.  
45  
46  
47

48 49 **Ethics and Dissemination** The results of this review will provide a comprehensive  
49  
50 51 understanding of smart garment concepts used in the sports domain. The findings of  
51  
52 52 this scoping review will be shared through a journal publication and a conference  
53  
54 53 presentation. Ethical approval is not needed for this scoping review.  
55  
56 54  
57

58 51 **Protocol registration number:** DOI 10.17605/OSF.IO/34MF2 (<https://osf.io/34mf2>)  
59  
60 52

1  
2  
3 53 **Keywords:** Smart garments, Athletes, Wellness, Sports, Health, Heat illnesses  
4

5 54 **Strengths and limitations of the study**  
6

- 7  
8 55 • The proposed study uses existing scoping review methodology to identify the  
9  
10 56 effects of smart garments on the wellbeing of athletes.  
11  
12 57 • The study will give an in-depth understanding of the current state of smart  
13  
14 58 sportswear for athletes.  
15  
16 59 • The review will investigate literature from the last ten years.  
17  
18 60 • The scoping review will consider studies published in the English language.  
19  
20 61 • To capture a broad spectrum of smart garment applications incorporated in  
21  
22 62 professional sportswear, we will consider all the studies that reported the effects  
23  
24 63 of smart garments designed for professional athletes.  
25  
26  
27  
28

29 64 **INTRODUCTION**

30  
31 65 Smart garments are clothing items that are made with intelligent materials or electronic  
32  
33 66 technologies, which can sense, react or adapt behaviour to the circumstances. [1] These  
34  
35 67 smart garments are also known as a branch of wearable computers that evolved from  
36  
37 68 the essential monitoring devices such as heart rate monitors, fitness monitors, and smart  
38  
39 69 wristwatches like Fitbit. Smart garments can be worn like regular clothing, and they  
40  
41 70 can measure a broad spectrum of biomechanical and physiological metrics and provide  
42  
43 71 advanced functions like posture controlling to support the health and wellbeing of the  
44  
45 72 athlete.[2-4]  
46  
47  
48  
49

50 73 The majority of smart garment applications integrate sensor technology that enables  
51  
52 74 wireless health monitoring.[5] One such example is Hexoskin, which is a clinically  
53  
54 75 validated smart shirt that can measure biological/physical parameters like cardiac,  
55  
56 76 respiratory, sleep, and activity data. [6] Temperature monitoring using wearable sensors  
57  
58 77 and smart cooling are some other smart applications that can be integrated into clothing  
59  
60

78 to enhance the comfort and wellness of an individual. [7-9] Smart monitoring and other  
79 related functions offered by some of the existing smart garments are listed in Table 1.

80 Table 1: Some examples of smart garment applications

| Smart Function        | Smart Garment Applications                                                                                                                                                                                                     |
|-----------------------|--------------------------------------------------------------------------------------------------------------------------------------------------------------------------------------------------------------------------------|
| Smart monitoring      | <ul style="list-style-type: none"> <li>• Biomonitoring: Heart rate, body temperature, breathing [10-12]</li> <li>• Posture monitoring [12-14]</li> <li>• Micro-climate temperature and humidity monitoring [15, 16]</li> </ul> |
| Other smart functions | <ul style="list-style-type: none"> <li>• Smart cooling [12, 16, 17]</li> <li>• Smart compression [18]</li> </ul>                                                                                                               |

81

82 Sportswear started getting subjected to the unique demands of athletes, to protect the  
83 wearer from extreme environmental conditions. Also, researchers explored sensor  
84 technologies as a means of enhancing the health and wellbeing of athletes.[19]  
85 Considering these, to address complex sportswear requirements and to improve the  
86 wellbeing of athletes, smart technologies with integrated sensors started to outspread  
87 into the sports market. Some of the existing studies explored the use of sensors to  
88 measure biological parameters (i.e., heart rate, muscle and oxygen saturation) and  
89 safety-related parameters (i.e., position, motion and impact) to enhance health,  
90 wellness, and performance of athletes. [20-22] Another study investigated the use of  
91 smart textiles in snowboarding activity where textile pressure sensors were utilised to  
92 recognise the activities performed by users.[21] Also, researchers developed a smart  
93 shirt and leggings to measure heart and muscle activity, breathing rate, and temperature.

1  
2  
3 94 [11] With these examples, it is evident that smart technology can be incorporated into  
4  
5 95 sportswear applications to enhance the wellbeing and performance of athletes.  
6  
7  
8 96

9  
10 97 Sportswear manufacturers started stretching the boundaries of smart wearables by  
11  
12 98 integrating technology into garments. [4] As mentioned in market reports, smart  
13  
14 99 garment applications in the sports sector are expected to exhibit high growth. [23]  
15  
16  
17 100 However, most of the commercialised sport smart garments offer standard functions  
18  
19 101 like smart monitoring, communication, compression and coaching. These garments  
20  
21 102 consist of non-textile electrical/electronic devices/components to inbuild intelligent  
22  
23 103 functions to the clothing inhibiting user experience. Researchers started exploring e-  
24  
25 104 textiles and designed smart technologies into textiles.[24, 25] Also, some studies  
26  
27 105 examined creative, smart applications to improve user experience. The smart garment  
28  
29 106 that reacts to the wearer mood is one such example. [26] These studies provide an  
30  
31 107 opportunity for future smart sports garments that can improve the health and wellbeing  
32  
33 108 of athletes. A technology mapping and review of existing smart garments designed for  
34  
35 109 athletes will assist in understanding how these smart garments may inform the new  
36  
37 110 product development and guide further research.  
38  
39  
40  
41  
42

### 43 **Rationale**

44 112 Several researchers have reviewed the applications of wearable technology and smart  
45  
46 113 garment technology. [19, 22, 27-30] However, most of these papers are focusing on  
47  
48 114 medical or healthcare applications giving less priority to the wellness of athletes. [29,  
49  
50 115 31, 32] Furthermore, the variety of smart garment applications available in the literature  
51  
52 116 is overwhelming. Therefore, the proposed review is essential to compare the vast array  
53  
54 117 of technologies incorporated into smart garments for athletes and also to understand the  
55  
56 118 knowledge gaps for future research. [33, 34]  
57  
58  
59  
60

1  
2  
3 119 Some of the existing reviews discuss smart garment technologies that can be applied in  
4  
5 120 the sportswear domain. Yet, they are either outdated [20, 21] or not comprehensive  
6  
7 121 enough to provide an in-depth understanding of the current state of smart sportswear  
8  
9 122 [35] or focusing only on smart monitoring. [22] Due to the fast-evolving nature of smart  
10  
11 123 garment applications, researchers frequently introduce novel technologies and  
12  
13 124 materials. [36, 37] One such novel application is recently introduced wearable textile  
14  
15 125 electronics that can uplift the performance of future smart sports clothing. [36]  
16  
17 126 Metatextiles that offer adaptable thermal comfort and energy harvesting Triboelectrics  
18  
19 127 materials that can be used to optimise power consumption of smart sports garments are  
20  
21 128 few other new smart technology applications. [36, 37]. These latest technologies can  
22  
23 129 fulfil a wide variety of sportswear requirements shifting smart sports garments to a new  
24  
25 130 dimension.

26  
27 131 Considering the requirements described above, a comprehensive review, which follows  
28  
29 132 a systematic approach and covers the latest smart sports garment applications is  
30  
31 133 essential to ensure effective use of the latest technologies in future smart garment  
32  
33 134 design projects. Therefore, this paper presents a protocol for conducting a scoping  
34  
35 135 review that can provide a comprehensive evaluation and a technology mapping of the  
36  
37 136 latest smart sports garment technologies to guide future research. The objectives of this  
38  
39 137 review are to identify a) the functions offered by the smart garments, b) the types of  
40  
41 138 technologies used in smart garments, c) effects (beneficial and harmful) of those  
42  
43 139 garments on the performance of athletes and their experience in using such garments.  
44  
45  
46  
47  
48  
49  
50

51 140

52 141

53 142

54 143

## 144 **METHODS**

145 We follow the scoping review methodology proposed by Arksey and O'Malley. [38]

146 This protocol consists of six phases namely; 1. identifying the research question, 2.

147 identifying relevant literature, 3. study selection, 4. charting the data, 5. collating,

148 summarising and reporting the articles and 6. consulting and translating knowledge

149 (optional). PRISMA-ScR checklist (see Additional file 1) will be used throughout the

150 proposed scoping review to ensure adherence.[39] The study has been registered in the

151 Open Science Framework (OSF) on June 25, 2020 (<https://osf.io/34mf2>).

152

### 153 **Stage 1: identifying the research question**

154 The objective of this study is to assess the existing studies to understand the current

155 smart garment technologies, which are developed to enhance the health and wellbeing

156 of athletes. Also, this review will generate input requirements for developing improved

157 smart garment for athletes. To concretise the focus of this review, we will concentrate

158 on smart garment studies related to professional athletes. The review is expected to

159 address the below questions.

- 160 • What functions do smart garments offer for professional athletes?
- 161 • What are the technologies incorporated into those smart garments?
- 162 • How effective are those smart garments to enhance the health and
- 163 wellbeing of athletes?

164

### 165 **Stage 2: identifying relevant studies**

166 The research team developed the search strategy after reviewing related literature, and

167 an iterative approach was adhered to finalise the strategy (see Additional file 2). The

168 search strings were generated by incorporating Boolean logic and operators. These

1  
2  
3 169 strings consist of search terms, which were finalised after getting agreement from the  
4  
5 170 research team. The search terms are "sensor garments", "electronic garments", "smart  
6  
7  
8 171 garments", "smart apparel", "sports", and "athletes".  
9

10 172

11  
12 173 The databases, which were selected to collect literature are Scopus, Web of Science,  
13  
14 174 Science Direct, PubMed, and IEEE Xplore, and these databases were chosen with the  
15  
16  
17 175 help of an expert university librarian. Due to the rapid technological changes, smart  
18  
19 176 garment applications are quickly becoming outdated; hence only the studies published  
20  
21 177 within the last ten years will be considered for the review. Furthermore, to ensure the  
22  
23 178 credibility of the studies, we only considered peer-reviewed journal articles. Also, only  
24  
25  
26 179 the studies in the English language will be included for review. The research team will  
27  
28 180 review the first 50 search results from each database before proceeding with the full  
29  
30  
31 181 search to ensure the accuracy of the search strategy. However, during the execution of  
32  
33 182 search strategy authors of primary studies or reviews will be contacted for further  
34  
35 183 information, if required. The latest search was executed on 24/05/2020. The articles  
36  
37 184 retrieved from the search will be imported into the Covidence software, which will  
38  
39  
40 185 remove duplicated items automatically.  
41

42 186

### 43 44 45 187 **Stage 3: study selection: inclusion and exclusion criteria**

46 188 We will carry out study selection incorporating two-step method. Initially, titles and  
47  
48 189 abstracts will be reviewed against the selection criteria and will be marked as 'include',  
49  
50  
51 190 'exclude' or 'uncertain'. Two reviewers will conduct this screening independently, and  
52  
53 191 a discussion will be undertaken in the research team to resolve any discrepancy and to  
54  
55 192 fine-tune selection criteria. This screening and discussion process will continue until  
56  
57  
58 193 we reach a consensus. [40] Subsequently, for the included studies, the full-text review  
59  
60

194 will be carried out against the selection criteria following the same screening procedure.

195 Grey literature will not be considered for this review.

196 This two-stage study selection process will be conducted, incorporating a review  
197 form (see Additional file 3). Only the studies with electronic integrated smart sports  
198 garment, which focus on health and wellbeing of professional athletes will be included  
199 for the review. The review form will incorporate the following inclusion criteria to  
200 simplify the screening process.

- 201 • Is the article a peer-reviewed primary study?
- 202 • Is the article published within the last ten years (2010-2019) in the English  
203 language?
- 204 • Does the article involve smart garments?
- 205 • Does the article focus on the health and wellbeing of professional athletes?

206 The citations of the included studies will be evaluated against selection criteria  
207 following the same two-stage study selection process to select the additional studies if  
208 required.

#### 209 **Step 4: charting the data**

210 All included studies will be reviewed and charted using a data extraction form (see  
211 Additional file 4). The details, which will be extracted from the studies are study  
212 citation, publication type, authors, study location, study year, target market, sample  
213 characteristics (number of participants and demographics), garment type, number of  
214 functions, function type (i.e., biomonitoring, coaching, warning, and posture control),  
215 technology characteristics (sensor type, method of power supply,  
216 communication/feedback mechanism and interconnection), evaluation protocol



1  
2  
3 217 adhered, user acceptability of the concepts and outcome of the study (quantitative  
4  
5 218 results, qualitative themes, recommendations, key learnings, and limitations). The  
6  
7  
8 219 charting of the extracted information will be conducted by two reviewers.  
9

10 220

11  
12 221 **Stage 5: collating, summarising and reporting the results**

13  
14 222 Initially, we will conduct a quantitative analysis for extracted data using descriptive  
15  
16 223 statistics (e.g., frequencies). This analysis will provide numerical summaries of a) smart  
17  
18 224 sports garment applications designed focusing on professional athletes, b) the functions  
19  
20 225 offered by those smart garments, c) the types of technologies used in smart garments  
21  
22 226 and d) effects (beneficial and harmful) of those garments on the performance of athletes  
23  
24 227 and their experience in using such garments. These details will be presented using  
25  
26 228 tables, charts, and graphs and will be followed by a brief summary. Afterwards, we will  
27  
28 229 analyse all the extracted data thematically to identify emerging themes. Two reviewers  
29  
30 230 will independently identify the emerging themes, and those themes will be reviewed  
31  
32 231 later by both reviewers to determine the final themes.  
33  
34  
35  
36  
37  
38

39 232 **Patient and public involvement**

40  
41  
42 233 This scoping review protocol does not include patients or the public.  
43  
44 234

45  
46  
47 235 **ETHICS/DISSEMINATION**

48  
49  
50 236 This protocol reports a comprehensive methodology derived from the standard and  
51  
52 237 well-established best practices to guide a scoping review that will be conducted to  
53  
54 238 understand the existing smart sports garments applications. The proposed study will  
55  
56 239 provide a comprehensive review and a technology mapping of the latest smart sports  
57  
58 240 garment technologies that were developed to enhance the wellbeing of athletes. The  
59  
60

1  
2  
3 241 scoping review findings will offer foundational know-how on sports smart garment  
4  
5 242 applications emphasising the technology and design gaps to assist new product  
6  
7 243 development and to inform further research. In future work, we are planning to  
8  
9 244 disseminate the results of this scoping review at relevant conferences and journals.  
10  
11  
12 245 Ethical approval is not needed for this scoping review, as we will not collect any  
13  
14 246 primary data.  
15  
16

#### 17 247 **Additional files**

18  
19  
20 248 Additional file 01: PRISMA-ScR Checklist.pdf

21  
22 249 This document includes the PRISMA-ScR protocol checklist.

23  
24 250 Additional file 02: Search Strategy.pdf

25  
26 251 This document includes the search strategy that will be incorporated to execute the  
27  
28 252 search.

29  
30 253 Additional file 03: Review Form.pdf

31  
32 254 This form includes the criteria for screening the sources for the scoping review.

33  
34 255 Additional file 04: Data extraction Form.pdf

35  
36 256 This form includes the format that will facilitate the charting of scoping review data  
37  
38 257 to enable analysis.

39  
40 258

#### 41 42 43 44 45 259 **Declarations**

46  
47 260

#### 48 49 261 **Acknowledgments**

50  
51 262 Not applicable

#### 52 53 263 **Patient and Public Involvement**

54  
55 264 No patients and or public will be involved to conduct this study or to design the  
56  
57 265 protocol.  
58  
59  
60

1  
2  
3 266 **Funding**  
4

5 267 Not applicable  
6

7  
8 268 **Availability of data and materials**  
9

10 269 Not applicable  
11

12 270 **Author contribution**  
13

14 271 AAM and TIW contributed to plan the study and prepare the manuscript. All the authors  
15 272 (AAM, TIW and BK) read and approved the final manuscript.  
16 273

17  
18  
19 274 **Ethics approval and consent to participate**  
20

21 275 Not applicable.  
22

23 276 **Consent for publication**  
24

25 277 Not applicable  
26

27 278 **Competing interest**  
28

29 279 The authors declare that they have no competing interests  
30

31 280 **Author details**  
32

33 281 Not applicable  
34

35 282  
36

37 283  
38

39 284

**REFERENCES**

- 40  
41  
42  
43  
44 285 1. Ariyatum, B., et al., *The future design direction of smart clothing*  
45 286 *development*. Journal of the Textile Institute, 2005. **96**(4): p. 199-210.  
46 287 2. *Nike granted patent for smart shoe with in-built fitness tracking*, in *The*  
47 288 *Sunday Morning Herald*. 2016.  
48 289 3. Draper, S. *Top 5 Smart Clothes for Workout Freaks in the Market Right*  
49 290 *Now*. 2018; Available from: [https://www.wearable-](https://www.wearable-technologies.com/2018/08/top-5-smart-clothes-for-workout-freaks-in-the-market-right-now/)  
50 291 [technologies.com/2018/08/top-5-smart-clothes-for-workout-freaks-in-](https://www.wearable-technologies.com/2018/08/top-5-smart-clothes-for-workout-freaks-in-the-market-right-now/)  
51 292 [the-market-right-now/](https://www.wearable-technologies.com/2018/08/top-5-smart-clothes-for-workout-freaks-in-the-market-right-now/).  
52 293 4. Sawh, M. *The best smart clothing*. 2018; Available from:  
53 294 <https://www.wareable.com/smart-clothing/best-smart-clothing>.  
54 295 5. Koh, A., et al., *A soft, wearable microfluidic device for the capture, storage,*  
55 296 *and colorimetric sensing of sweat*. Science translational medicine, 2016.  
56 297 **8**(366): p. 366ra165-366ra165.  
57  
58  
59  
60

- 1  
2  
3 298 6. HEXOSKIN *HEXOSKIN SMART GARMENTS SPECIFICATIONS*. n.d.; Available  
4 299 from: <https://www.hexoskin.com/>.
- 5  
6 300 7. Paul, G., E. Gim, and D. Westerfeld. *Battery powered heating and cooling*  
7 301 *suit*. in *IEEE Long Island Systems, Applications and Technology (LISAT)*  
8 302 *Conference 2014*. 2014.
- 9 303 8. Suzuki, Y., et al. *Wearable individual adapting cooling system using*  
10 304 *smartphone and heart beat sensor*. in *2016 55th Annual Conference of the*  
11 305 *Society of Instrument and Control Engineers of Japan (SICE)*. 2016.
- 12 306 9. Li, H., et al., *Wearable sensors in intelligent clothing for measuring human*  
13 307 *body temperature based on optical fiber Bragg grating*. *Optics express*,  
14 308 2012. **20**(11): p. 11740-11752.
- 15 309 10. Paiva, A., et al. *Design of a Smart Garment for Cycling*. 2019. Cham:  
16 310 Springer International Publishing.
- 17 311 11. Paiva, A., et al. *Design of smart garments for sports and rehabilitation*. in  
18 312 *IOP Conference Series: Materials Science and Engineering*. 2018. IOP  
19 313 Publishing.
- 20 314 12. Durbhaka, G.K. *Adaptive wearable smart fabric based on body posture and*  
21 315 *temperature*. in *2016 2nd International Conference on Advances in*  
22 316 *Computing, Communication, & Automation (ICACCA) (Fall)*. 2016.
- 23 317 13. Wang, Q., et al. *Smart Rehabilitation Garment for posture monitoring*. in  
24 318 *2015 37th Annual International Conference of the IEEE Engineering in*  
25 319 *Medicine and Biology Society (EMBC)*. 2015.
- 26 320 14. Wang, Q., et al. *Zishi: a smart garment for posture monitoring*. in  
27 321 *Proceedings of the 2016 CHI Conference Extended Abstracts on Human*  
28 322 *Factors in Computing Systems*. 2016.
- 29 323 15. Linti, C., et al. *Sensory baby vest for the monitoring of infants*. in  
30 324 *International Workshop on Wearable and Implantable Body Sensor*  
31 325 *Networks (BSN'06)*. 2006. IEEE.
- 32 326 16. Jahangir, M., et al. *Design and Testing of Cooling Jacket using Peltier Plate*.  
33 327 in *2019 International Conference on Applied and Engineering Mathematics*  
34 328 *(ICAEM)*. 2019. IEEE.
- 35 329 17. Wickramarathne, T.I., A.A. Mahmud, and B. Kuys, *Exploring Smart Cooling*  
36 330 *Garments for Endurance Cycling Athletes*, in *Proceedings of the 31st*  
37 331 *Australian Conference on Human-Computer-Interaction*. 2019, Association  
38 332 for Computing Machinery: Fremantle, WA, Australia. p. 563–567.
- 39 333 18. Belbasis, A. and F.K. Fuss, *Muscle Performance Investigated With a Novel*  
40 334 *Smart Compression Garment Based on Pressure Sensor Force Myography*  
41 335 *and Its Validation Against EMG*. 2018. **9**(408).
- 42 336 19. Choi, J., et al., *Skin-interfaced systems for sweat collection and analytics*.  
43 337 *Science advances*, 2018. **4**(2): p. eaar3921.
- 44 338 20. Coyle, S., et al. *Textile-Based Wearable Sensors for Assisting Sports*  
45 339 *Performance*. in *2009 Sixth International Workshop on Wearable and*  
46 340 *Implantable Body Sensor Networks*. 2009.
- 47 341 21. Holleczeck, T., et al. *Textile pressure sensors for sports applications*. in  
48 342 *SENSORS, 2010 IEEE*. 2010. IEEE.
- 49 343 22. Seshadri, D.R., et al., *Wearable sensors for monitoring the internal and*  
50 344 *external workload of the athlete*. *NPJ digital medicine*, 2019. **2**(1): p. 1-18.
- 51 345 23. Hanuska, A., et al., *Smart clothing market analysis*. 2016, Technical Report.
- 52  
53  
54  
55  
56  
57  
58  
59  
60

- 1  
2  
3 346 24. IDTechEx. *Introducing the latest in textiles: Soft hardware*. 2018; Available  
4 347 from:  
5 348 [https://www.wearabletechnologyinsights.com/articles/15079/introduci](https://www.wearabletechnologyinsights.com/articles/15079/introducing-the-latest-in-textiles-soft-hardware)  
6 349 [ng-the-latest-in-textiles-soft-hardware](https://www.wearabletechnologyinsights.com/articles/15079/introducing-the-latest-in-textiles-soft-hardware).  
7  
8 350 25. Lugoda, P., T. Dias, and R. Morris, *Electronic temperature sensing yarn*.  
9 351 *Journal of Multidisciplinary Engineering Science Studies*, 2015. **1**(1).  
10 352 26. eScent. *PERSONALISED SCENT BUBBLE*. n.d.; Available from:  
11 353 <https://www.escent.ai/smartsecondskin>.  
12 354 27. Tang, S.L.P. and G. Stylios, *An overview of smart technologies for clothing*  
13 355 *design and engineering*. *International Journal of Clothing Science*  
14 356 *Technology*, 2006.  
15 357 28. Papi, E., W.S. Koh, and A.H. McGregor, *Wearable technology for spine*  
16 358 *movement assessment: A systematic review*. *Journal of Biomechanics*, 2017.  
17 359 **64**: p. 186-197.  
18 360 29. Patel, S., et al., *A review of wearable sensors and systems with application in*  
19 361 *rehabilitation*. *Journal of NeuroEngineering and Rehabilitation*, 2012.  
20 362 **9**(1): p. 21.  
21 363 30. Stoppa, M. and A. Chiolerio, *Wearable electronics and smart textiles: a*  
22 364 *critical review*. *sensors*, 2014. **14**(7): p. 11957-11992.  
23 365 31. Moral-Munoz, J.A., et al., *Smartphone-based systems for physical*  
24 366 *rehabilitation applications: A systematic review*. *Assistive Technology*,  
25 367 2019: p. 1-14.  
26 368 32. Kirk, M.A., et al., *Wearable Technology and Physical Activity Behavior*  
27 369 *Change in Adults With Chronic Cardiometabolic Disease: A Systematic*  
28 370 *Review and Meta-Analysis*. *American Journal of Health Promotion*, 2019.  
29 371 **33**(5): p. 778-791.  
30 372 33. Fernández-Caramés, T.M. and P. Fraga-Lamas, *Towards the Internet of*  
31 373 *smart clothing: A review on IoT wearables and garments for creating*  
32 374 *intelligent connected e-textiles*. *Electronics*, 2018. **7**(12): p. 405.  
33 375 34. Sayem, A.S.M., et al., *Review on Smart Electro-Clothing Systems (SeCSs)*.  
34 376 2019.  
35 377 35. Rajput, M. and R. Singh, *Study of smart textile in sports and designing a*  
36 378 *smart jersey for athletes health issue*. *International Research Journal of*  
37 379 *Engineering and Technology*, 2017. **04**(06).  
38 380 36. The Hong Kong Polytechnic University. *Highly flexible high-energy textile*  
39 381 *lithium battery to cope with surging demand for wearable electronics*.  
40 382 2019; Available from:  
41 383 <https://www.sciencedaily.com/releases/2019/05/190524102744.htm>.  
42 384 37. Kapfunde, M. *5 innovations that could help smart clothing go mainstream*.  
43 385 2019; Available from: [https://www.wearable.com/smart-clothing/smart-](https://www.wearable.com/smart-clothing/smart-clothing-technology-innovations-7284)  
44 386 [clothing-technology-innovations-7284](https://www.wearable.com/smart-clothing/smart-clothing-technology-innovations-7284).  
45 387 38. Arksey, H. and L. O'Malley, *Scoping studies: towards a methodological*  
46 388 *framework*. *International journal of social research methodology*, 2005.  
47 389 **8**(1): p. 19-32.  
48 390 39. Shamseer, L., et al., *Preferred reporting items for systematic review and*  
49 391 *meta-analysis protocols (PRISMA-P) 2015: elaboration and explanation*.  
50 392 *Bmj*, 2015. **349**.  
51 393 40. Orwin, R., et al., *The Handbook of Research Synthesis*. , 1994: p. 150-1.  
52  
53  
54  
55  
56  
57  
58  
59  
60 394

## Preferred Reporting Items for Systematic reviews and Meta-Analyses extension for Scoping Reviews (PRISMA-ScR) Checklist

| SECTION                                               | ITEM | PRISMA-ScR CHECKLIST ITEM                                                                                                                                                                                                                                                                                  | REPORTED ON PAGE # |
|-------------------------------------------------------|------|------------------------------------------------------------------------------------------------------------------------------------------------------------------------------------------------------------------------------------------------------------------------------------------------------------|--------------------|
| <b>TITLE</b>                                          |      |                                                                                                                                                                                                                                                                                                            |                    |
| Title                                                 | 1    | Identify the report as a scoping review.                                                                                                                                                                                                                                                                   | 1                  |
| <b>ABSTRACT</b>                                       |      |                                                                                                                                                                                                                                                                                                            |                    |
| Structured summary                                    | 2    | Provide a structured summary that includes (as applicable): background, objectives, eligibility criteria, sources of evidence, charting methods, results, and conclusions that relate to the review questions and objectives.                                                                              | 2                  |
| <b>INTRODUCTION</b>                                   |      |                                                                                                                                                                                                                                                                                                            |                    |
| Rationale                                             | 3    | Describe the rationale for the review in the context of what is already known. Explain why the review questions/objectives lend themselves to a scoping review approach.                                                                                                                                   | 3-6                |
| Objectives                                            | 4    | Provide an explicit statement of the questions and objectives being addressed with reference to their key elements (e.g., population or participants, concepts, and context) or other relevant key elements used to conceptualize the review questions and/or objectives.                                  | 6                  |
| <b>METHODS</b>                                        |      |                                                                                                                                                                                                                                                                                                            |                    |
| Protocol and registration                             | 5    | Indicate whether a review protocol exists; state if and where it can be accessed (e.g., a Web address); and if available, provide registration information, including the registration number.                                                                                                             | NA                 |
| Eligibility criteria                                  | 6    | Specify characteristics of the sources of evidence used as eligibility criteria (e.g., years considered, language, and publication status), and provide a rationale.                                                                                                                                       | 7                  |
| Information sources*                                  | 7    | Describe all information sources in the search (e.g., databases with dates of coverage and contact with authors to identify additional sources), as well as the date the most recent search was executed.                                                                                                  | 7                  |
| Search                                                | 8    | Present the full electronic search strategy for at least 1 database, including any limits used, such that it could be repeated.                                                                                                                                                                            | Appendix           |
| Selection of sources of evidence†                     | 9    | State the process for selecting sources of evidence (i.e., screening and eligibility) included in the scoping review.                                                                                                                                                                                      | 7-8                |
| Data charting process‡                                | 10   | Describe the methods of charting data from the included sources of evidence (e.g., calibrated forms or forms that have been tested by the team before their use, and whether data charting was done independently or in duplicate) and any processes for obtaining and confirming data from investigators. | 9                  |
| Data items                                            | 11   | List and define all variables for which data were sought and any assumptions and simplifications made.                                                                                                                                                                                                     | 9-10               |
| Critical appraisal of individual sources of evidence§ | 12   | If done, provide a rationale for conducting a critical appraisal of included sources of evidence; describe the methods used and how this information was used in any data synthesis (if appropriate).                                                                                                      | NA                 |



| SECTION                                       | ITEM | PRISMA-ScR CHECKLIST ITEM                                                                                                                                                                       | REPORTED ON PAGE # |
|-----------------------------------------------|------|-------------------------------------------------------------------------------------------------------------------------------------------------------------------------------------------------|--------------------|
| Synthesis of results                          | 13   | Describe the methods of handling and summarizing the data that were charted.                                                                                                                    | 10                 |
| <b>RESULTS</b>                                |      |                                                                                                                                                                                                 |                    |
| Selection of sources of evidence              | 14   | Give numbers of sources of evidence screened, assessed for eligibility, and included in the review, with reasons for exclusions at each stage, ideally using a flow diagram.                    | NA                 |
| Characteristics of sources of evidence        | 15   | For each source of evidence, present characteristics for which data were charted and provide the citations.                                                                                     | NA                 |
| Critical appraisal within sources of evidence | 16   | If done, present data on critical appraisal of included sources of evidence (see item 12).                                                                                                      | NA                 |
| Results of individual sources of evidence     | 17   | For each included source of evidence, present the relevant data that were charted that relate to the review questions and objectives.                                                           | NA                 |
| Synthesis of results                          | 18   | Summarize and/or present the charting results as they relate to the review questions and objectives.                                                                                            | NA                 |
| <b>DISCUSSION</b>                             |      |                                                                                                                                                                                                 |                    |
| Summary of evidence                           | 19   | Summarize the main results (including an overview of concepts, themes, and types of evidence available), link to the review questions and objectives, and consider the relevance to key groups. | NA                 |
| Limitations                                   | 20   | Discuss the limitations of the scoping review process.                                                                                                                                          | 10                 |
| Conclusions                                   | 21   | Provide a general interpretation of the results with respect to the review questions and objectives, as well as potential implications and/or next steps.                                       | NA                 |
| <b>FUNDING</b>                                |      |                                                                                                                                                                                                 |                    |
| Funding                                       | 22   | Describe sources of funding for the included sources of evidence, as well as sources of funding for the scoping review. Describe the role of the funders of the scoping review.                 | NA                 |

JB1 = Joanna Briggs Institute; PRISMA-ScR = Preferred Reporting Items for Systematic reviews and Meta-Analyses extension for Scoping Reviews.

\* Where *sources of evidence* (see second footnote) are compiled from, such as bibliographic databases, social media platforms, and Web sites.

† A more inclusive/heterogeneous term used to account for the different types of evidence or data sources (e.g., quantitative and/or qualitative research, expert opinion, and policy documents) that may be eligible in a scoping review as opposed to only studies. This is not to be confused with *information sources* (see first footnote).

‡ The frameworks by Arksey and O'Malley (6) and Levac and colleagues (7) and the JBI guidance (4, 5) refer to the process of data extraction in a scoping review as data charting.

§ The process of systematically examining research evidence to assess its validity, results, and relevance before using it to inform a decision. This term is used for items 12 and 19 instead of "risk of bias" (which is more applicable to systematic reviews of interventions) to include and acknowledge the various sources of evidence that may be used in a scoping review (e.g., quantitative and/or qualitative research, expert opinion, and policy document).

From: Tricco AC, Lillie E, Zarin W, O'Brien KK, Colquhoun H, Levac D, et al. PRISMA Extension for Scoping Reviews (PRISMAScR): Checklist and Explanation. *Ann Intern Med.* 2018;169:467–473. doi: 10.7326/M18-0850.

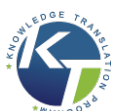

St. Michael's

Inspired Care.  
Inspiring Science.

For peer review only - <http://bmjopen.bmj.com/site/about/guidelines.xhtml>

## Smart Garments to Enhance Health and Wellbeing of Athletes

| Database       | Search string                                                                                                                                                                                                                                                                                                                                                                                                                                                                                                                                                                 | Number of entries | date       | Source type | Data                                                               | Time frame |
|----------------|-------------------------------------------------------------------------------------------------------------------------------------------------------------------------------------------------------------------------------------------------------------------------------------------------------------------------------------------------------------------------------------------------------------------------------------------------------------------------------------------------------------------------------------------------------------------------------|-------------------|------------|-------------|--------------------------------------------------------------------|------------|
| Scopus         | ALL ( ("sensor garment*" OR "electronic garment*" OR "smart garment*" OR "smart apparel") AND ( sport* OR athlet* ) AND ( health OR well-being OR wellness OR illnesses ) ) AND ( LIMIT-TO ( PUBYEAR , 2018 ) OR LIMIT-TO ( PUBYEAR , 2017 ) OR LIMIT-TO ( PUBYEAR , 2016 ) OR LIMIT-TO ( PUBYEAR , 2015 ) OR LIMIT-TO ( PUBYEAR , 2019 ) OR LIMIT-TO ( PUBYEAR , 2014 ) OR LIMIT-TO ( PUBYEAR , 2013 ) OR LIMIT-TO ( PUBYEAR , 2012 ) OR LIMIT-TO ( PUBYEAR , 2011 ) OR LIMIT-TO ( PUBYEAR , 2010 ) ) AND ( LIMIT-TO ( SRCTYPE , "j" ) ) AND ( LIMIT-TO ( DOCTYPE , "ar" ) ) | 50                | 05/06/2020 | Journals    | ALL*                                                               | 2010-2019  |
| IEEE           | ((("Full Text & Metadata":sensor garment OR sensor garments OR electronic garment OR electronic garments OR smart garment OR smart garments OR smart apparel) AND "Full Text & Metadata":sport% OR athlet%)<br><br><b>Filters Applied:</b><br>2010 - 2019                                                                                                                                                                                                                                                                                                                     | 84                | 05/06/2020 | Journals    | Full text + Metadata ( <i>Abstract, title and indexing terms</i> ) | 2010-2019  |
| Web of Science | TS=(( "sensor garment*" OR "electronic garment*" OR "smart garment*" OR "smart apparel") AND (sport* OR athlet*))<br><b>Refined by:</b> DOCUMENT TYPES: ( ARTICLE )<br><b>Timespan:</b> 2019-2010                                                                                                                                                                                                                                                                                                                                                                             | 1                 | 05/06/2020 | Article     | TS=Topic Searches title, abstract, author keywords, and more       | 2010-2019  |



1  
2  
3  
4  
5  
6  
7  
8  
9  
10  
11  
12  
13  
14  
15  
16  
17  
18  
19  
20  
21  
22  
23  
24  
25  
26  
27  
28  
29  
30  
31  
32  
33  
34  
35  
36  
37  
38  
39  
40  
41  
42  
43  
44  
45  
46

|                |                                                                                                                                                                                                                                                                                                                             |     |                                                 |                                |           |           |
|----------------|-----------------------------------------------------------------------------------------------------------------------------------------------------------------------------------------------------------------------------------------------------------------------------------------------------------------------------|-----|-------------------------------------------------|--------------------------------|-----------|-----------|
| Science Direct | (sensor OR smart OR electronic) AND (garment OR garments) AND (sport OR sports OR athlete OR athletes)<br><br><b>Timespan: 2019-2010</b><br><br><i>Cannot use more than 8 Boolean operators and wildcards , hence the results are not filtered for below:</i><br><br><i>(health OR well-being OR wellness OR illnesses)</i> | 415 | 05/06/2020                                      | Research articles              | Full text | 2010-2019 |
| PubMed         | ("sensor garment*" OR "electronic garment*" OR "smart garment*" OR "smart apparel") AND ( sport* OR athlet*)<br>Year-2010-2019                                                                                                                                                                                              | 5   | 25/06/2020<br><br>Verified again-<br>21/09/2021 | All the studies except reviews | Full text | 2010-2019 |

*\*SCOPUS ALL: Entering ALL("heart attack") will return documents with "heart attack" in the article title, source title, language, author, editor, affiliation, abstract, keywords, references, DOI, ISBN, ISSN, CODEN, issue, volume, publication year, sequence bank, sequence bank number, article number, chemical name, CAS registry number, manufacturer, publisher, or conference fields*

Language Filter was not used for the pilot search strategy

## SCOPUS

Advance search query:

ALL ( ( "sensor garment\*" OR "electronic garment\*" OR "smart garment\*" OR "smart apparel" ) AND ( sport\* OR athlet\* ) AND ( health OR well-being OR wellness OR illnesses ) )  
) AND ( LIMIT-TO ( SRCTYPE , "j" ) ) AND ( LIMIT-TO ( DOCTYPE , "ar" ) ) AND  
LIMIT-TO ( PUBYEAR,2018)  
OR LIMIT-TO ( PUBYEAR,2017)  
OR LIMIT-TO ( PUBYEAR,2016)  
OR LIMIT-TO ( PUBYEAR,2015)  
OR LIMIT-TO ( PUBYEAR,2019)  
OR LIMIT-TO ( PUBYEAR,2014)  
OR LIMIT-TO ( PUBYEAR,2013)  
OR LIMIT-TO ( PUBYEAR,2012)  
OR LIMIT-TO ( PUBYEAR,2011)  
OR LIMIT-TO ( PUBYEAR,2010)  
)

**IEEE**

Step 01

Advanced Search ?

Advanced Search

Command Search

Citation Search

Enter keywords, select fields, and select operators

Search Term  in  ?

AND  in    

Step 02

Filtering year range & filtering the source types: Journals and conferences

Year ^

Single Year  Range

From

To

- view only

1  
2  
3  
4  
5  
6  
7  
8  
9  
10  
11  
12  
13  
14  
15  
16  
17  
18  
19  
20  
21  
22  
23  
24  
25  
26  
27  
28  
29  
30  
31  
32  
33  
34  
35  
36  
37  
38  
39  
40  
41  
42  
43  
44  
45  
46

Showing 1-25 of 117 for  
(("Full Text & Metadata":sensor garment OR sensor garments OR electronic garment OR electronic garments OR smart garment OR smart garments OR smart apparel) AND "Full Text & Metadata":sport% OR athlet%) x  
health OR well-being OR wellness OR illnesses x

▼ Filters Applied: 2010 - 2019 x

- |                                           |                                                    |                                        |                                    |
|-------------------------------------------|----------------------------------------------------|----------------------------------------|------------------------------------|
| <input type="checkbox"/> Conferences (74) | <input checked="" type="checkbox"/> Journals (25)  | <input type="checkbox"/> Magazines (8) | <input type="checkbox"/> Books (6) |
| <input type="checkbox"/> Standards (3)    | <input type="checkbox"/> Early Access Articles (1) |                                        |                                    |

Apply

Feedback

### Web of Science

Advance search query:

TS=(( "sensor garment\*" OR "electronic garment\*" OR "smart garment\*" OR "smart apparel") AND (sport\* OR athlet\*))

Refined by: DOCUMENT TYPES: (ARTICLE)

Timespan: 2019-2010

### Science Direct

Advance search query:

(sensor OR smart OR electronic) AND (garment OR garments) AND (sport OR sports OR athlete OR athletes)

Year: 2010-2019

Article Types: Research articles

### PubMed

Advance search query:

1  
2  
3  
4  
5  
6  
7  
8  
9  
10  
11  
12  
13  
14  
15  
16  
17  
18  
19  
20  
21  
22  
23  
24  
25  
26  
27  
28  
29  
30  
31  
32  
33  
34  
35  
36  
37  
38  
39  
40  
41  
42  
43  
44  
45  
46

("sensor garment\*" OR "electronic garment\*" OR "smart garment\*" OR "smart apparel") AND ( sport\* OR athlet\*)

**Year:** 2010-2019

**Article Types:**

All the studies except reviews

For peer review only
