# Supplementary material for: Effects of smart garments on the well-being of athletes: a scoping review protocol
Source: PubMed Central journal article supplement — BMJ Open. 2020 Nov 19;10(11):e042127. doi: 10.1136/bmjopen-2020-042127 (PMC7678371; doi:10.1136/bmjopen-2020-042127), 2020-11-19
Supplement: bmjopen-2020-042127supp002.pdf [file bmjopen-2020-042127supp002.pdf]

## Smart Garments to Enhance Health and Wellbeing of Athletes

| Database       | Search string                                                                                                                                                                                                                                                                                                                                                                                                                                                                                                                                                                   | Number of entries | date       | Source type | Data                                                                | Time frame |
|----------------|---------------------------------------------------------------------------------------------------------------------------------------------------------------------------------------------------------------------------------------------------------------------------------------------------------------------------------------------------------------------------------------------------------------------------------------------------------------------------------------------------------------------------------------------------------------------------------|-------------------|------------|-------------|---------------------------------------------------------------------|------------|
| Scopus         | ALL ( ( "sensor garment*" OR "electronic garment*" OR "smart garment*" OR "smart apparel" ) AND ( sport* OR athlet* ) AND ( health OR well-being OR wellness OR illnesses ) ) AND ( LIMIT-TO ( PUBYEAR , 2018 ) OR LIMIT-TO ( PUBYEAR , 2017 ) OR LIMIT-TO ( PUBYEAR , 2016 ) OR LIMIT-TO ( PUBYEAR , 2015 ) OR LIMIT-TO ( PUBYEAR , 2019 ) OR LIMIT-TO ( PUBYEAR , 2014 ) OR LIMIT-TO ( PUBYEAR , 2013 ) OR LIMIT-TO ( PUBYEAR , 2012 ) OR LIMIT-TO ( PUBYEAR , 2011 ) OR LIMIT-TO ( PUBYEAR , 2010 ) ) AND ( LIMIT-TO ( SRCTYPE , "j" ) ) AND ( LIMIT-TO ( DOCTYPE , "ar" ) ) | 50                | 05/06/2020 | Journals    | ALL*                                                                | 2010-2019  |
| IEEE           | (("Full Text & Metadata":sensor garment OR sensor garments OR electronic garment OR electronic garments OR smart garment OR smart garments OR smart apparel) AND "Full Text & Metadata":sport% OR athlet%)<br><br><b>Filters Applied:</b><br>2010 - 2019                                                                                                                                                                                                                                                                                                                        | 84                | 05/06/2020 | Journals    | Full text + Meta data ( <i>Abstract, title and indexing terms</i> ) | 2010-2019  |
| Web of Science | TS=(( "sensor garment*" OR "electronic garment*" OR "smart garment*" OR "smart apparel") AND (sport* OR athlet*))<br><b>Refined by:</b> DOCUMENT TYPES: ( ARTICLE )<br><b>Timespan:</b> 2019-2010                                                                                                                                                                                                                                                                                                                                                                               | 1                 | 05/06/2020 | Article     | TS=Topic Searches title, abstract, author keywords, and more        | 2010-2019  |

|                |                                                                                                                                                                                                                                                                                                                             |     |                                                 |                                |           |           |
|----------------|-----------------------------------------------------------------------------------------------------------------------------------------------------------------------------------------------------------------------------------------------------------------------------------------------------------------------------|-----|-------------------------------------------------|--------------------------------|-----------|-----------|
| Science Direct | (sensor OR smart OR electronic) AND (garment OR garments) AND (sport OR sports OR athlete OR athletes)<br><br><b>Timespan:</b> 2019-2010<br><br><i>Cannot use more than 8 Boolean operators and wildcards , hence the results are not filtered for below:</i><br><br><i>(health OR well-being OR wellness OR illnesses)</i> | 415 | 05/06/2020                                      | Research articles              | Full text | 2010-2019 |
| PubMed         | ("sensor garment*" OR "electronic garment*" OR "smart garment*" OR "smart apparel") AND ( sport* OR athlet*)<br>Year-2010-2019                                                                                                                                                                                              | 5   | 25/06/2020<br><br>Verified again-<br>21/09/2021 | All the studies except reviews | Full text | 2010-2019 |

*\*SCOPUS ALL: Entering ALL("heart attack") will return documents with "heart attack" in the article title, source title, language, author, editor, affiliation, abstract, keywords, references, DOI, ISBN, ISSN, CODEN, issue, volume, publication year, sequence bank, sequence bank number, article number, chemical name, CAS registry number, manufacturer, publisher, or conference fields*

Language Filter was not used for the pilot search strategy

## SCOPUS

Advance search query:

```
ALL ( ( "sensor garment*" OR "electronic garment*" OR "smart garment*" OR "smart apparel" ) AND ( sport* OR athlet* ) AND ( health OR well-being OR wellness OR illnesses ) ) AND ( LIMIT-TO ( SRCTYPE , "j" ) ) AND ( LIMIT-TO ( DOCTYPE , "ar" ) ) AND LIMIT-TO ( PUBYEAR,2018) OR LIMIT-TO ( PUBYEAR,2017) OR LIMIT-TO ( PUBYEAR,2016) OR LIMIT-TO ( PUBYEAR,2015) OR LIMIT-TO ( PUBYEAR,2019) OR LIMIT-TO ( PUBYEAR,2014) OR LIMIT-TO ( PUBYEAR,2013) OR LIMIT-TO ( PUBYEAR,2012) OR LIMIT-TO ( PUBYEAR,2011) OR LIMIT-TO ( PUBYEAR,2010) )
```

## IEEE

### Step 01

#### Advanced Search [?](#)

Advanced Search Command Search Citation Search

Enter keywords, select fields, and select operators

Search Term  
sensor garment OR sensor garments OR electronic garmen in Full Text & Metadata [?](#)

AND Search Term  
sport% OR athlet% in Full Text & Metadata [↑](#) [×](#) [+](#)

### Step 02

#### Filtering year range & filtering the source types: Journals and conferences

Year [^](#)

Single Year Range

2010 2019

From To

2010 2019

Showing 1-25 of 117 for  
(("Full Text & Metadata":sensor garment OR sensor garments OR electronic garment OR electronic garments OR smart garment OR smart garments OR smart apparel) AND "Full Text & Metadata":sport% OR athlet%) ×  
health OR well-being OR wellness OR illnesses ×

▼ Filters Applied: 2010 - 2019 ×

|                                           |                                                    |                                        |                                    |
|-------------------------------------------|----------------------------------------------------|----------------------------------------|------------------------------------|
| <input type="checkbox"/> Conferences (74) | <input checked="" type="checkbox"/> Journals (25)  | <input type="checkbox"/> Magazines (8) | <input type="checkbox"/> Books (6) |
| <input type="checkbox"/> Standards (3)    | <input type="checkbox"/> Early Access Articles (1) |                                        |                                    |

[Apply](#) [Feedback](#)

### **Web of Science**

Advance search query:

TS=(( "sensor garment\*" OR "electronic garment\*" OR "smart garment\*" OR "smart apparel") AND (sport\* OR athlet\*))

**Refined by:** DOCUMENT TYPES: (ARTICLE)

**Timespan:** 2019-2010

### **Science Direct**

Advance search query:

(sensor OR smart OR electronic) AND (garment OR garments) AND (sport OR sports OR athlete OR athletes)

**Year:** 2010-2019

**Article Types:** Research articles

### **PubMed**

Advance search query:

("sensor garment\*" OR "electronic garment\*" OR "smart garment\*" OR "smart apparel") AND ( sport\* OR athlet\*)

**Year:** 2010-2019

**Article Types:**

All the studies except reviews
