# Supplementary material for: Effects of smart garments on the well-being of athletes: a scoping review protocol
Source: PubMed Central journal article supplement — BMJ Open. 2020 Nov 19;10(11):e042127. doi: 10.1136/bmjopen-2020-042127 (PMC7678371; doi:10.1136/bmjopen-2020-042127), 2020-11-19
Supplement: bmjopen-2020-042127supp004.pdf [file bmjopen-2020-042127supp004.pdf]

| # | Title | Publication type | Authors | Year | Country | Target market | Sample characteristics (number of participants, demographics) | Garment type | Number of functions | Function type (bio monitoring, coaching, warning, posture control, etc...) | Technology characteristics | Evaluation protocol and User acceptance | Outcome |
|---|-------|------------------|---------|------|---------|---------------|---------------------------------------------------------------|--------------|---------------------|----------------------------------------------------------------------------|----------------------------|-----------------------------------------|---------|
|   |       |                  |         |      |         |               |                                                               |              |                     |                                                                            |                            |                                         |         |
|   |       |                  |         |      |         |               |                                                               |              |                     |                                                                            |                            |                                         |         |
|   |       |                  |         |      |         |               |                                                               |              |                     |                                                                            |                            |                                         |         |
|   |       |                  |         |      |         |               |                                                               |              |                     |                                                                            |                            |                                         |         |
|   |       |                  |         |      |         |               |                                                               |              |                     |                                                                            |                            |                                         |         |
|   |       |                  |         |      |         |               |                                                               |              |                     |                                                                            |                            |                                         |         |
|   |       |                  |         |      |         |               |                                                               |              |                     |                                                                            |                            |                                         |         |
|   |       |                  |         |      |         |               |                                                               |              |                     |                                                                            |                            |                                         |         |
